# Supplementary material for: Complete fusion of a transposon and herpesvirus created the Teratorn mobile element in medaka fish
Source: PubMed Central journal article supplement (PMC5601938; doi:10.1038/s41467-017-00527-2), 2017-09-15
Supplement: 41467_2017_527_MOESM1_ESM.pdf [file 41467_2017_527_MOESM1_ESM.pdf]

## **Description of Supplementary Files**

File Name: Supplementary Information

Description: Supplementary Figures and Supplementary Tables

File Name: Supplementary Data 1

Description: Fasta-formatted sequences of six individual *Teratorn* copies obtained by BAC sequencing.

File Name: Supplementary Data 2

Description: Sequences and gene annotations of *Teratorn* and *Teratorn*-like elements.

File Name: Peer Review File

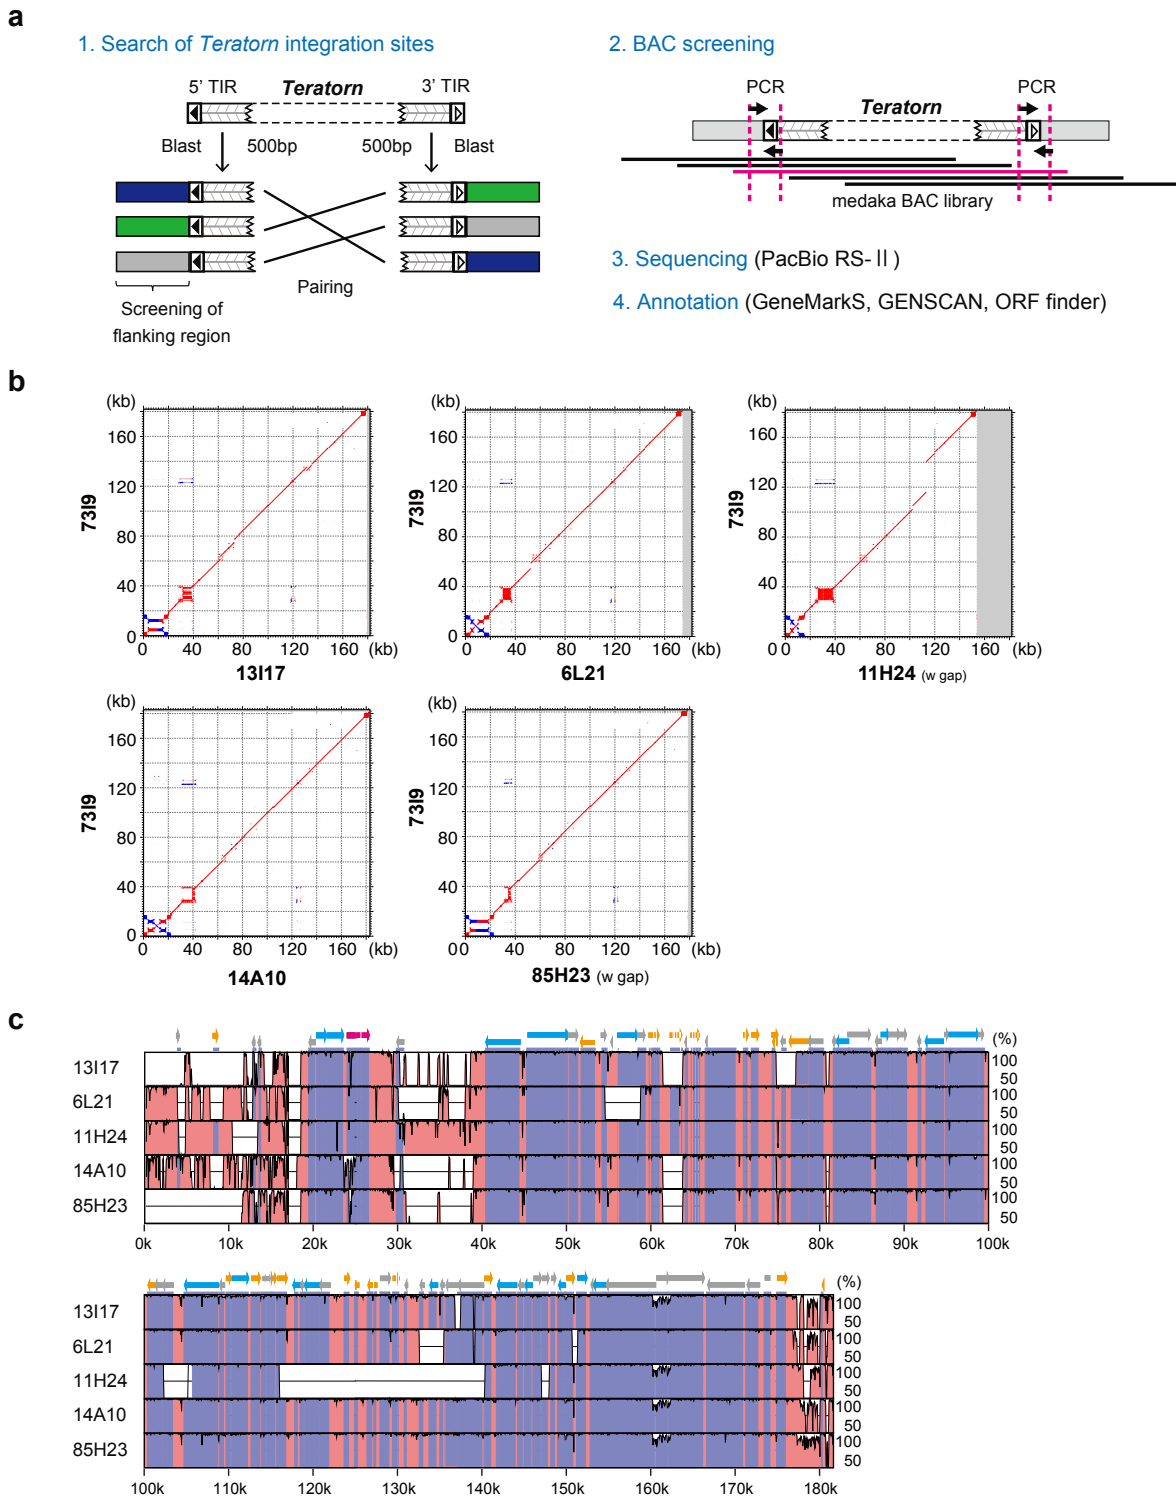

**Supplementary Figure 1 | Global structure is almost the same among individual *Teratorn* copies, except for some indels. (a)** The procedure of screening and sequencing of the full-length *Teratorn* copies: 1. *Teratorn* insertion site determination by screening of 5' and 3' flanking regions from the public medaka genome database, followed by pairing of the 5' and 3' flanking regions, which are derived from the same loci; 2. Screening of BAC clones that include the whole sequence of *Teratorn*; 3. Sequencing of BAC clones; 4. gene annotation. **(b)** Dot plots showing the alignment of one *Teratorn* copy (7319; named from the ID of BAC clone) with the other five copies (13117, 6L21, 11H24, 14A10, 85H23). The red and blue dots indicate that the corresponding residues of the two sequences match in the forward and reverse direction, respectively. Note that the synteny, including the position of repetitive region, is conserved among all copies. **(c)** Sequence comparison between one copy and the other five copies, visualized by VISTA. Purple and red indicate putative coding and non-coding regions, respectively. Arrows above the histogram indicate the position of genes in 7319 copy.

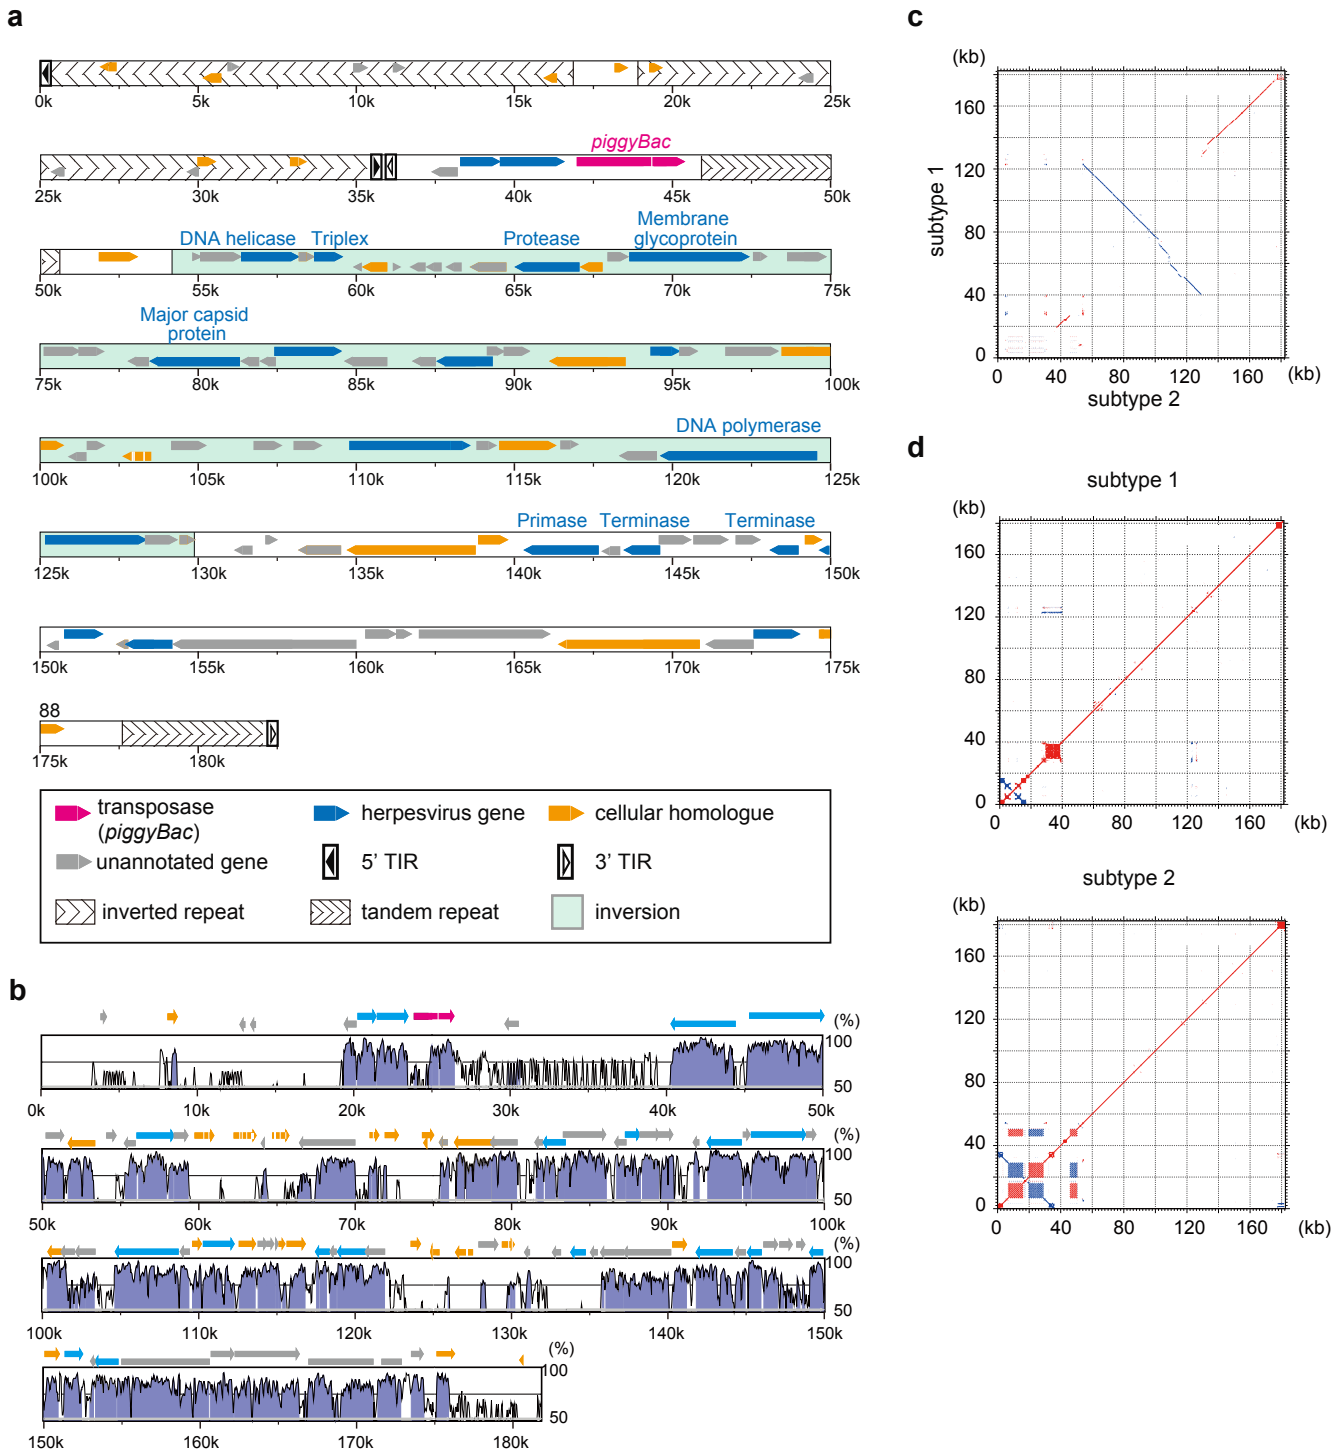

**Supplementary Figure 2 | There are two subtypes of *Teratorn*.** (a) Gene map of the consensus sequence of subtype 2 *Teratorn*. Predicted genes are classified into four categories depicted by colored arrowheads; magenta, *PiggyBac*-like transposase gene; blue, herpesvirus-like genes; yellow, cellular homologues; gray, unannotated genes. Terminal inverted repeats (TIR) of the *PiggyBac*-like transposon are depicted by boxed triangles. Light green region indicate a ~80-kb long inversion between subtype 1 and subtype 2. (b) Sequence comparison between *Teratorn* subtype 1 and subtype 2, visualized by VISTA. Blue and white regions indicate coding and non-coding regions, respectively. Arrows above the histogram indicate the position of genes inside *Teratorn* subtype 1. (c) A dot plot matrix showing the alignment of *Teratorn* subtype 1 and subtype 2. Note that synteny is almost conserved except for a ~80-kb long inversion in the middle. (d) Dot plots showing the alignment of each *Teratorn* subtype with itself. Note that the position of inverted repeat and tandem repeats are common between the two subtypes.

a

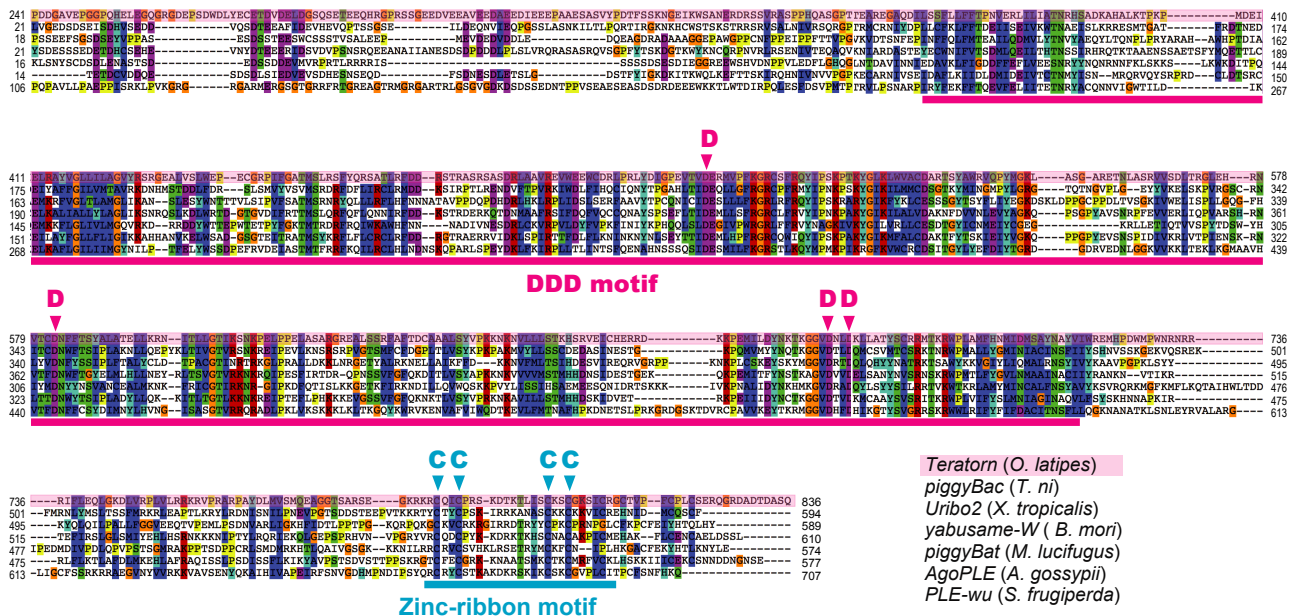

b

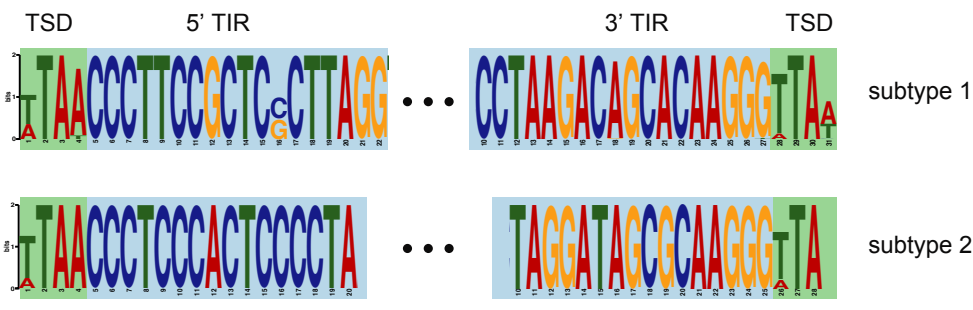

**Supplementary Figure 3 | *Teratorn* belongs to the *piggyBac* superfamily. (a)** Alignment of partial amino acid sequences of several active *piggyBac* superfamily transposase genes. Note the conservation of the four aspartic acid residues, which form the core of the ‘DDD motif’ and are required for the transposition reaction of *piggyBac* (magenta arrowheads). In addition, four cysteine residues at the C termini, which form the core of Zinc-ribbon motif with unknown function, are also conserved (blue arrowheads). **(b)** Consensus sequences of TIR and TSD of all *Teratorn* copies in the genome of the Hd-rR inbred strain, displayed by MEME. Note that sequence composition of TIR and TSD follow the rule of *piggyBac* superfamily; TIR length ranges from 12 to 19bp beginning with the “CCYT” motif, and targets TTAAG.

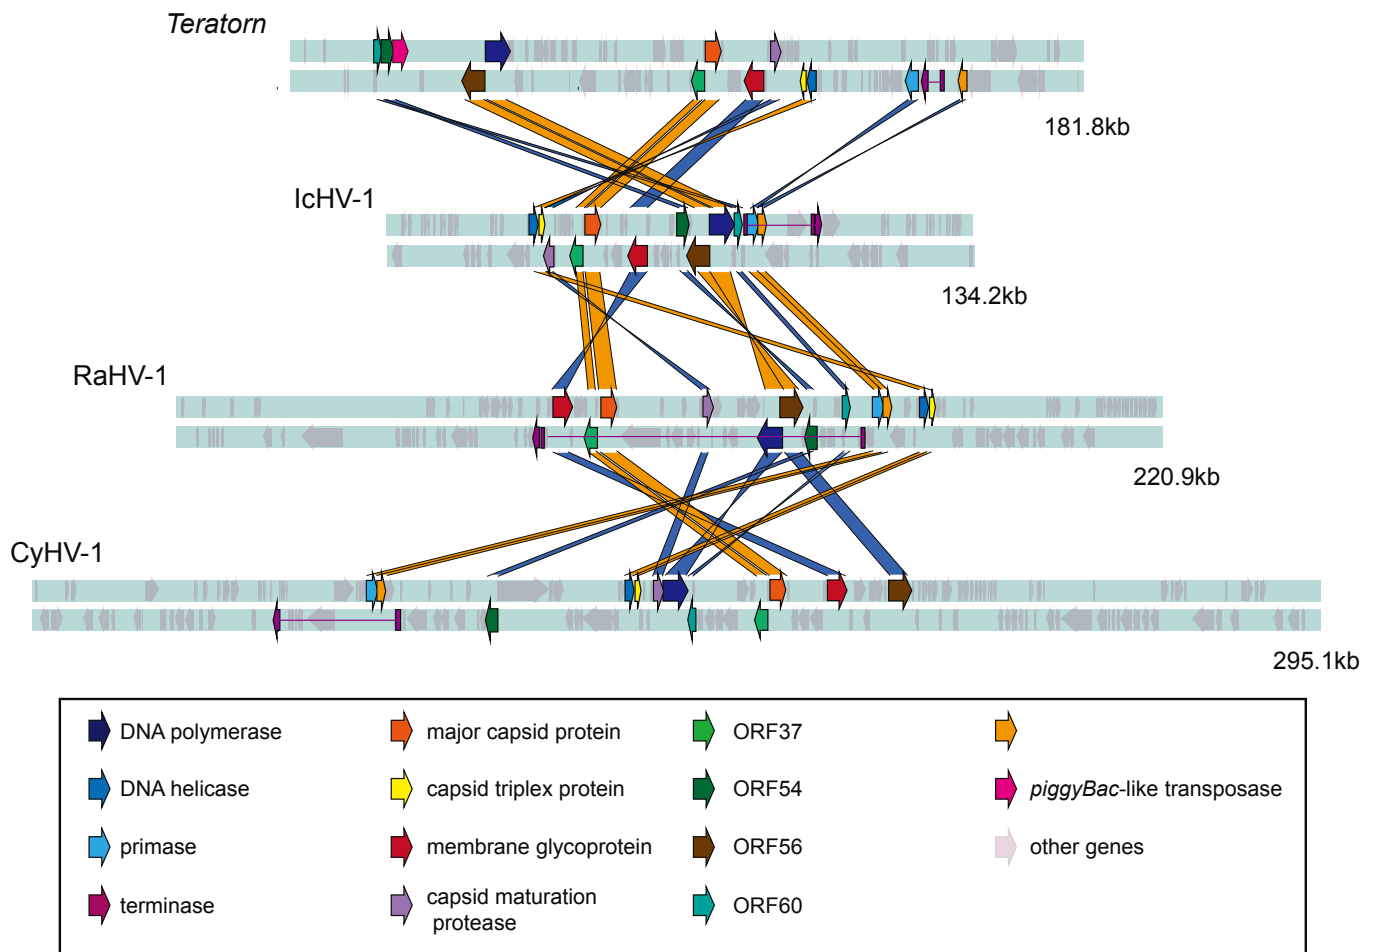

**Supplementary Figure 4 | Genomic comparison of *Teratorn* and alloherpesvirus species.** ORFs inside three alloherpesvirus species and *Teratorn* are drawn by arrows. Thirteen core genes indicated by colored arrows are connected by colored bars across different herpesvirus genomes (S. van Beurden and M. Engelsma, 2012<sup>24</sup>). Note that there are some conserved gene blocks among *Teratorn* and alloherpesvirus species (e.g. capsid triplex protein and DNA helicase, major capsid protein and ORF37, DNA polymerase and ORF56, primase and ORF64, orange bars), indicating that *Teratorn* belongs to the family *Alloherpesviridae*.

**a**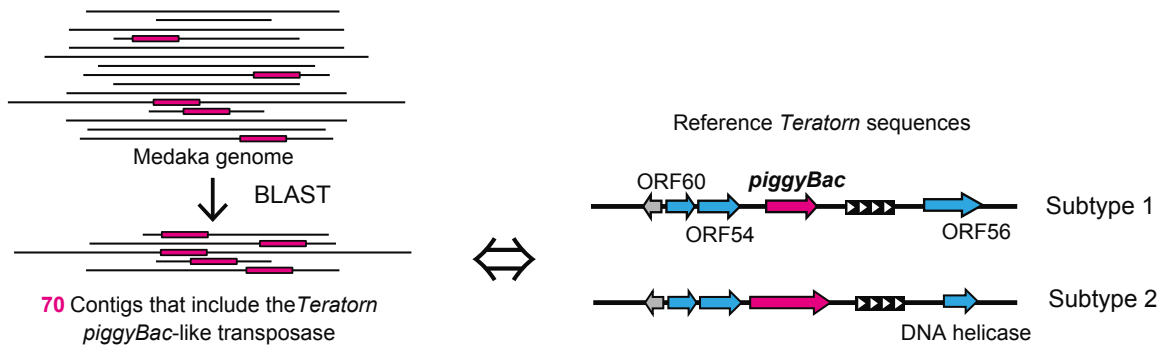**b**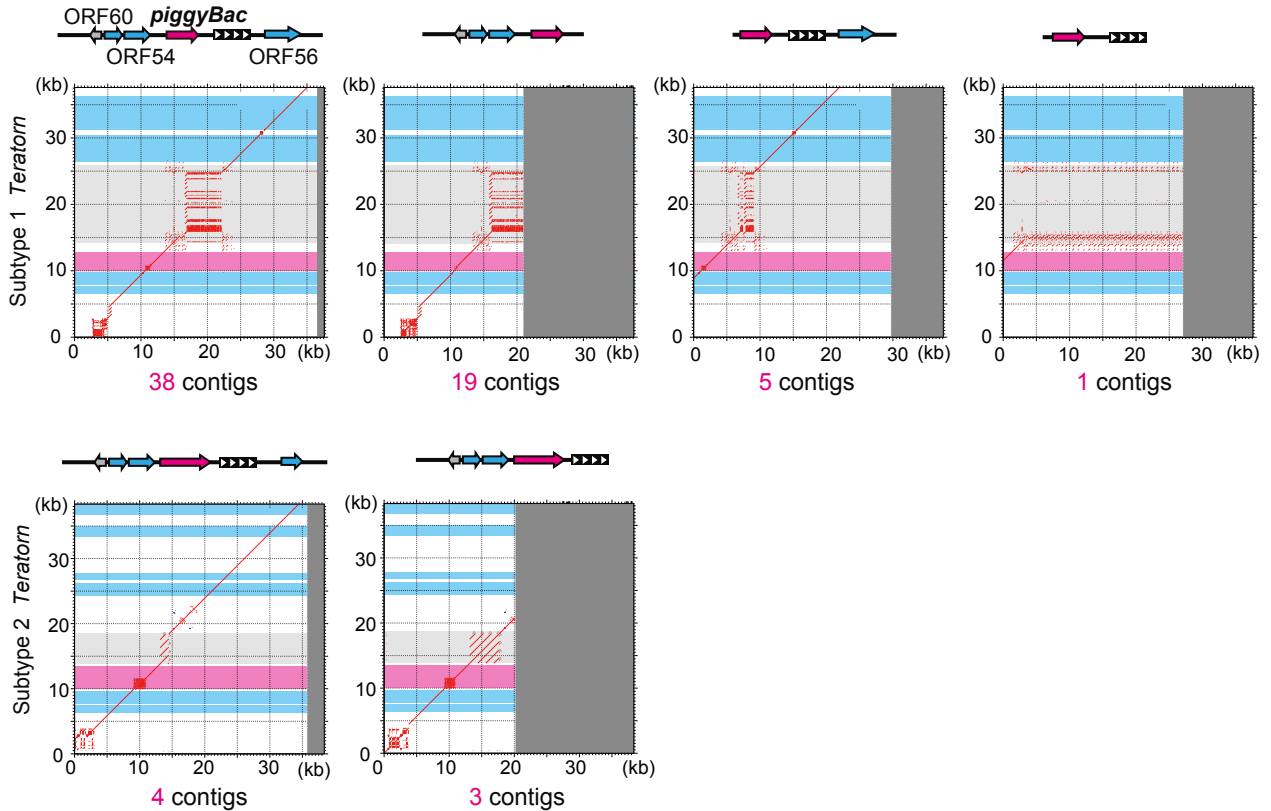

**Supplementary Figure 5 | All of the *piggyBac*-like transposase copies are adjacent to the herpesvirus genes in the medaka genome. (a)** The procedure of screening all contigs that include the *piggyBac*-like transposase gene of *Teratom*. First, all contigs that contain the transposase gene were screened from the medaka draft genome by blastn. For all contigs obtained, genomic neighborhoods around the transposase genes were tested by displaying alignment with the reference *Teratom* sequence. **(b)** Dot plots showing the alignment of the reference sequence of *Teratom* with the contigs screened from the medaka draft genome. Magenta, cyan and light gray indicate the coding region of the *piggyBac*-like transposase gene, herpesvirus genes and tandem repeats, respectively.

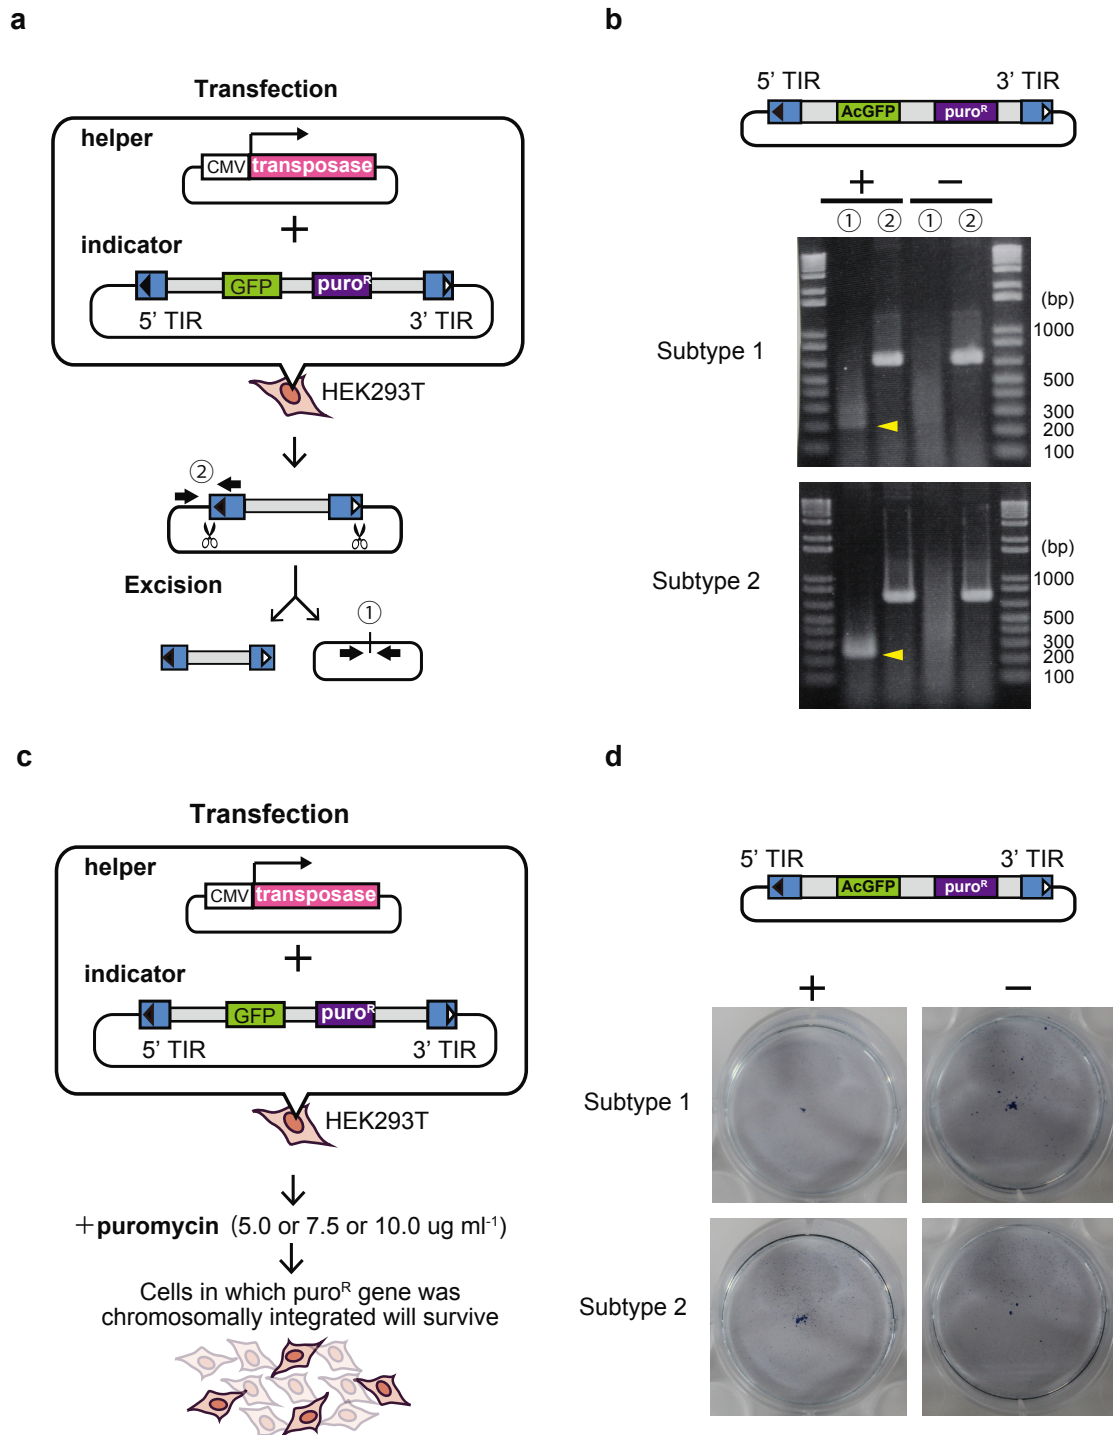

**Supplementary Figure 6 | Transposition assay using indicator plasmid that doesn't contain internal TIRs.**

**(a)** A schematic of the excision assay. In the helper plasmid, *Teratorn* transposase gene was expressed under the CMV promoter. In the indicator plasmid, a GFP reporter and a puromycin-resistant gene were flanked by the 5' and 3' TIR. Note that internal TIRs were not included, in contrast to the experiment shown in Figure 3. Transposition activity was examined by co-transfection of those two plasmids into HEK293T cells, followed by PCR-based detection of transposon cassette excision from the indicator plasmid. Thick arrows indicate primer pairs used for the excision assay. **(b)** Results of the excision assay in the absence of internal TIR. 5' and 3' TIRs are sufficient for excision reaction. **(c)** Schematic of the integration assay. In this assay, long-term chemical selection was carried out following plasmid transfection to screen transgenic cell lines. **(d)** Results of the integration assay. Without internal TIRs, chromosomal integration didn't occur even in the presence of transposase.

### Subtype 1

|           | flanking region | TSD   | <i>Teratorn</i>              | TSD  | flanking region |
|-----------|-----------------|-------|------------------------------|------|-----------------|
| indicator | TTTATCTGAT      | TTAA  | CCCTTCGCT . . . . . AGCAAGGG | TTAT | AGACTTTGCA      |
| 1         | TTTATCTGAT      | TTAA  | -----                        | ---- | AGACTTTGCA      |
| 2         | TTTATCTGAT      | TTAA  | -----                        | ---- | AGACTTTGCA      |
| 3         | TTTATCTGAT      | TTAA  | -----                        | ---- | AGACTTTGCA      |
| 4         | TTTATCTGAT      | TTAA  | -----                        | ---- | AGACTTTGCA      |
| 5         | TTTATCTGAT      | TTAA  | -----                        | ---- | AGACTTTGCA      |
| 6         | TTTATCTGAT      | TTAA  | -----                        | TTAT | AGACTTTGCA      |
| 7         | TTTATCTGAT      | ----- | -----                        | TTAT | AGACTTTGCA      |
| 8         | TTTATCTGAT      | ----- | -----                        | TTAT | AGACTTTGCA      |
| 9         | TTTATCTGAT      | ----- | -----                        | TTAT | AGACTTTGCA      |
| 10        | TTTATCTGAT      | ----- | -----                        | TTAT | AGACTTTGCA      |
| 11        | TTTATCTGAT      | ----- | -----                        | TTAT | AGACTTTGCA      |
| 12        | TTTATCTGAT      | ----- | -----                        | TTAT | AGACTTTGCA      |
| 13        | TTTATCTGAT      | ----- | -----                        | TTAT | AGACTTTGCA      |
| 14        | TTTATCTGAT      | ----- | -----                        | TTAT | AGACTTTGCA      |
| 15        | TTTATCTGAT      | ----- | -----                        | TTAT | AGACTTTGCA      |
| 16        | TTTATCTGAT      | ----- | -----                        | TTAT | AGACTTTGCA      |
| 17        | TTTATCTGAT      | ----- | -----                        | TTAT | AGACTTTGCA      |
| 18        | TTTATCTGAT      | ----- | -----                        | TTAT | AGACTTTGCA      |
| 19        | TTTATCTGAT      | ----- | -----                        | TTAT | AGACTTTGCA      |
| 20        | TTTATCTGAT      | ----- | -----                        | TTAT | AGACTTTGCA      |
| 21        | TTTATCTGAT      | ----- | -----                        | TTAT | AGACTTTGCA      |
| 22        | TTTATCTGAT      | ----- | -----                        | TTAT | AGACTTTGCA      |
| 23        | TTTATCTGAT      | ----- | -----                        | TTAT | AGACTTTGCA      |
| 24        | TTTATCTGAT      | ----- | -----                        | TTAT | AGACTTTGCA      |
| 25        | TTTATCTGAT      | ----- | -----                        | TTAT | AGACTTTGCA      |
| 26        | TTTATCTGAT      | ----- | -----                        | TTAT | AGACTTTGCA      |
| 27        | TTTATCTGAT      | ----- | -----                        | TTAT | AGACTTTGCA      |
| 28        | TTTATCTGAT      | TTAA  | -----                        | TTAT | AGACTTTGCA      |
| 29        | TTTATCTGAT      | ----- | -----A                       | TTAT | AGACTTTGCA      |

### Subtype 2

|           | flanking region | TSD   | <i>Teratorn</i>                 | TSD  | flanking region |
|-----------|-----------------|-------|---------------------------------|------|-----------------|
| indicator | CAGAAGCTCA      | TTAA  | CCCTCCCACT . . . . . AGCGCAAGGG | TTAT | TGAATTA AAA     |
| 1         | CAGAAGCTCA      | TTAA  | -----                           | ---- | TGAATTA AAA     |
| 2         | CAGAAGCTCA      | ----- | -----                           | TTAT | TGAATTA AAA     |
| 3         | CAGAAGCTCA      | ----- | -----                           | TTAT | TGAATTA AAA     |
| 4         | CAGAAGCTCA      | ----- | -----                           | TTAT | TGAATTA AAA     |
| 5         | CAGAAGCTCA      | ----- | -----                           | TTAT | TGAATTA AAA     |
| 6         | CAGAAGCTCA      | ----- | -----                           | TTAT | TGAATTA AAA     |
| 7         | CAGAAGCTCA      | ----- | -----                           | TTAT | TGAATTA AAA     |
| 8         | CAGAAGCTCA      | ----- | -----                           | TTAT | TGAATTA AAA     |
| 9         | CAGAAGCTCA      | ----- | -----                           | TTAT | TGAATTA AAA     |
| 10        | CAGAAGCTCA      | ----- | -----                           | TTAT | TGAATTA AAA     |
| 11        | CAGAAGCTCA      | ----- | -----                           | TTAT | TGAATTA AAA     |
| 12        | CAGAAGCTCA      | ----- | -----                           | TTAT | TGAATTA AAA     |
| 13        | CAGAAGCTCA      | ----- | -----                           | TTAT | TGAATTA AAA     |
| 14        | CAGAAGCTCA      | ----- | -----                           | TTAT | TGAATTA AAA     |
| 15        | CAGAAGCTCA      | ----- | -----                           | TTAT | TGAATTA AAA     |
| 16        | CAGAAGCTCA      | ----- | -----                           | TTAT | TGAATTA AAA     |
| 17        | CAGAAGCTCA      | ----- | -----                           | TTAT | TGAATTA AAA     |
| 18        | CAGAAGCTCA      | ----- | -----                           | TTAT | TGAATTA AAA     |
| 19        | CAGAAGCTC -     | ----- | -----                           | TTAT | TGAATTA AAA     |
| 20        | CAGAAGCTCA      | TTAA  | -----                           | TTAT | TGAATTA AAA     |
| 21        | CAGAAGCTCA      | TTAA  | -----                           | TTAT | TGAATTA AAA     |
| 22        | CAGAAGCTCA      | TTA - | -----                           | TTAT | TGAATTA AAA     |
| 23        | CAGAAGCTCA      | TTA - | -----                           | TTAT | TGAATTA AAA     |

### Supplementary Figure 7 | Precise excision of *Teratorn* transposon cassette from the indicator plasmid.

Nucleotide sequences of PCR products obtained from the excision assay, as described in Figure 3b. The top line indicates the sequence of the indicator plasmid, and the following 29 (subtype 1) and 23 (subtype 2) lines indicate the sequences of individual subcloned PCR products. Note that the excision reaction occurred precisely, at high frequency (subtype 1, 26/29 clones; subtype 2, 18/23 clones), similar to other *piggyBac* superfamily DNA transposons<sup>28</sup>. TSD; target site duplication.



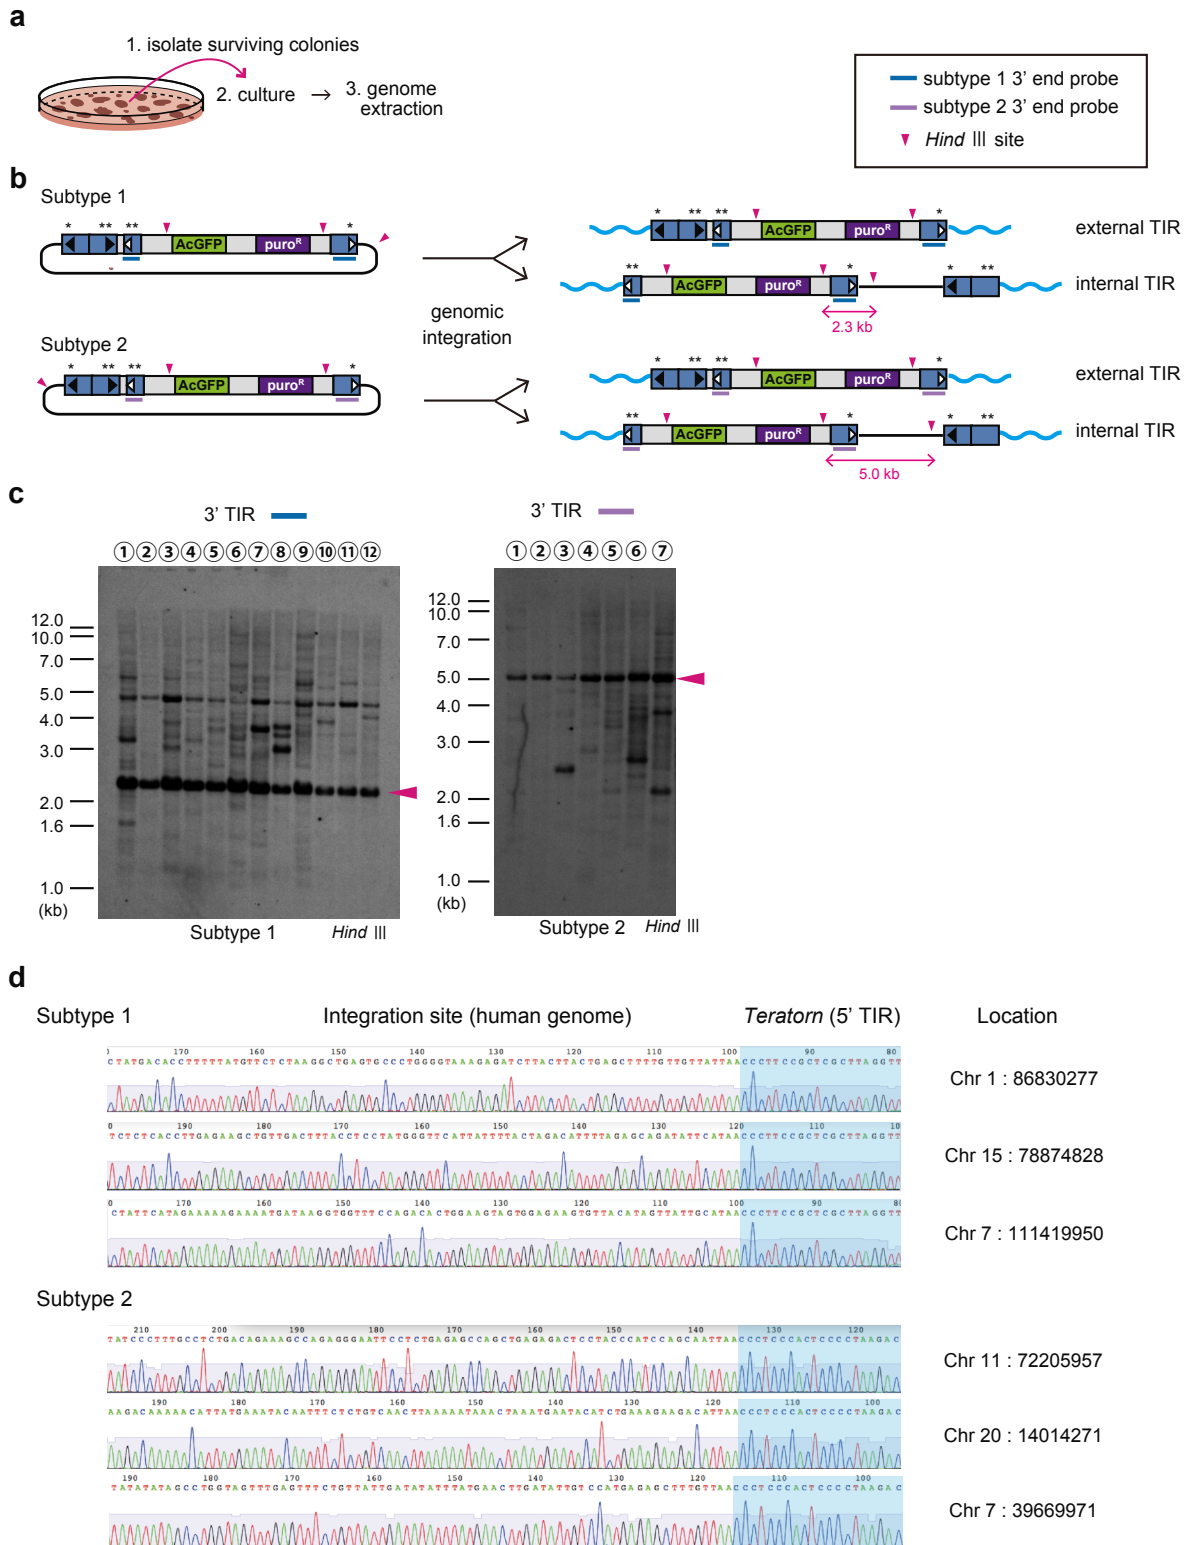

**Supplementary Figure 8 | Confirmation of in vitro integration of *Teratorn* transposon cassette into HEK293T cells. (a)** Isolation method of genomic DNA from cell colonies that survived puromycin selection. **(b)** Possible way of chromosomal integration of the indicator plasmids. Integration can be occurred via 1) external TIRs (upper) and/or internal TIRs (lower). Blue and purple bars indicate the position of the target sequences for southern hybridization (blue, subtype 1; purple, subtype 2). Magenta arrowheads indicate *Hind*III sites. **(c)** Southern blotting of genomic DNA of surviving colonies of HEK293T cells, using 3' terminal sequences as hybridization probes. Numbers above the lanes indicate the genomic DNA of individual colonies. Although the band pattern was different among individual clones, there is a common band (arrowheads) which size corresponds to the DNA fragment formed by *Hind*III digestion (depicted as double-headed arrows in b), suggesting that transposition via internal TIRs took place (as in b). **(d)** Examples of insertion sites of *Teratorn* transposon cassette in the genome of surviving HEK293T cell colonies. The blue region indicates the terminal sequence of *Teratorn*.

a

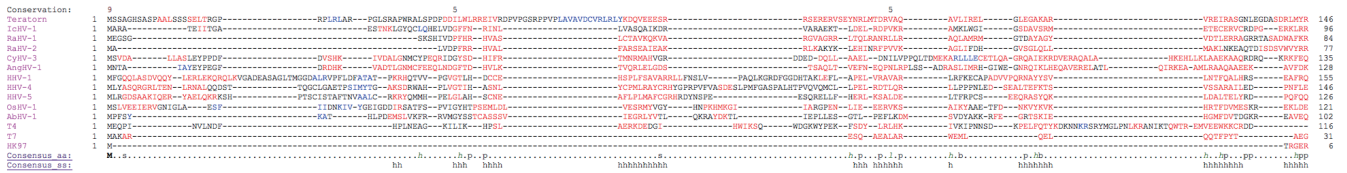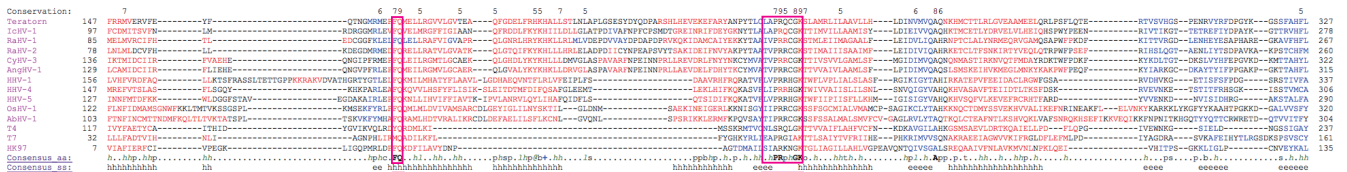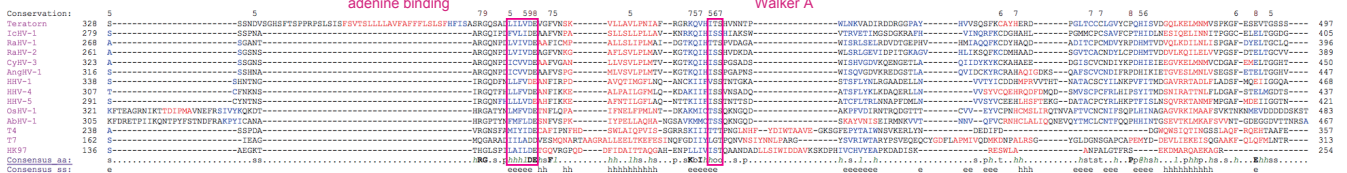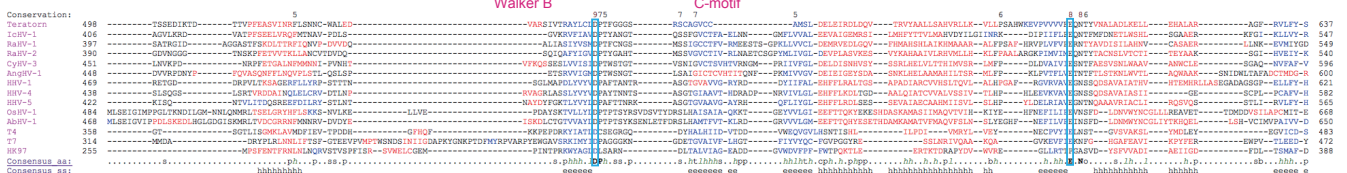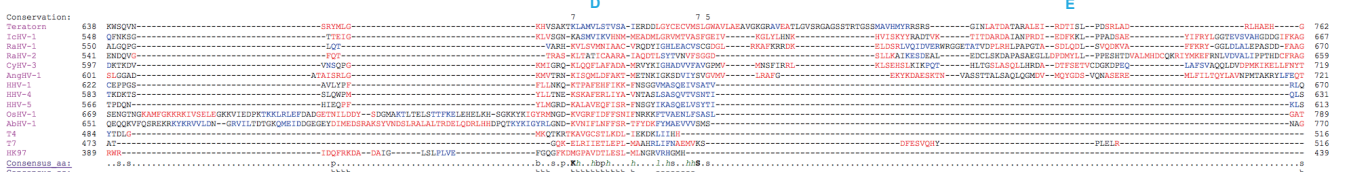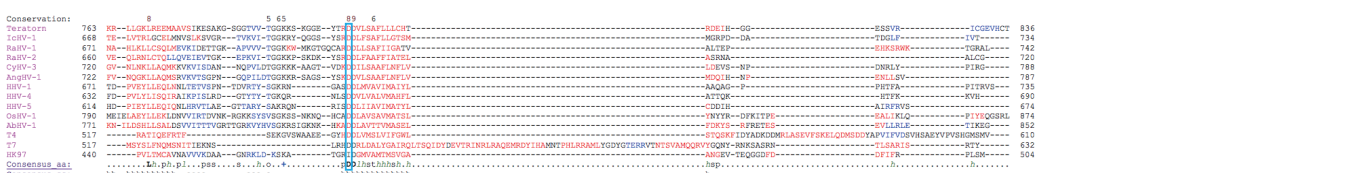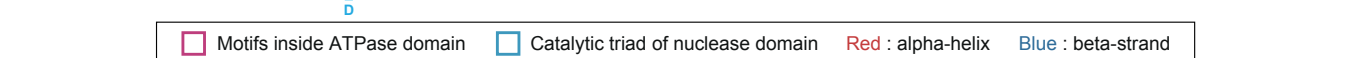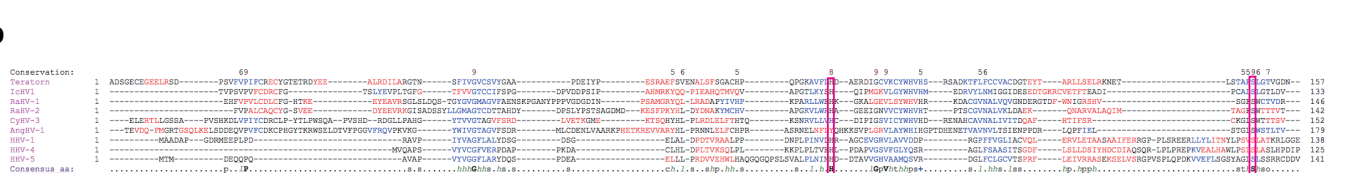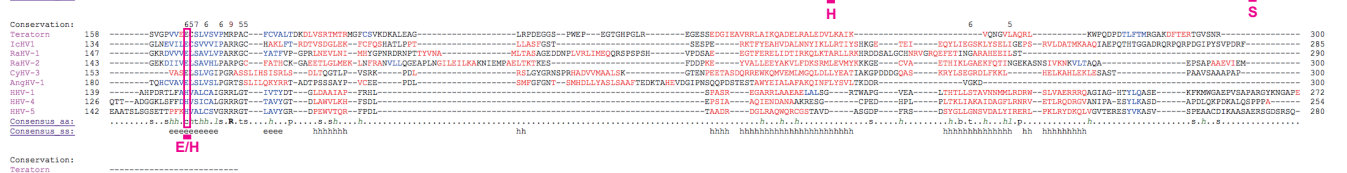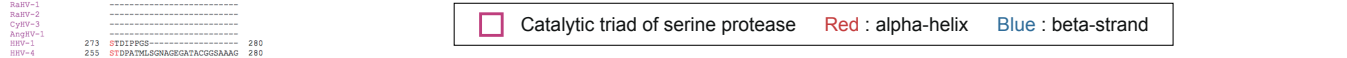

**Supplementary Figure 9 | Catalytic residues of DNA packaging terminase and capsid maturation protease are conserved in *Teratorn*.** (a) Multiple alignment of the full-length amino acid sequences of DNA packaging terminase gene, constructed by PROMALS3D<sup>61</sup> (*Teratorn*, magenta; *Alloherpesviridae*, blue; *Herpesviridae*, yellow; *Mallacoherpesviridae*, black; bacteriophages, green). Catalytic center motifs are depicted by magenta (ATPase domain) and cyan (nuclease domain), respectively<sup>30,31</sup>. Note the sequence conservation at catalytic centers in *Teratorn*. (b) Multiple alignment of partial sequence sequences of capsid maturation protease gene (*Teratorn*, magenta; *Alloherpesviridae*, blue; *Herpesviridae*, yellow). Note the sequence conservation of catalytic triads (His-Ser-His/Glu)<sup>32</sup>.

a

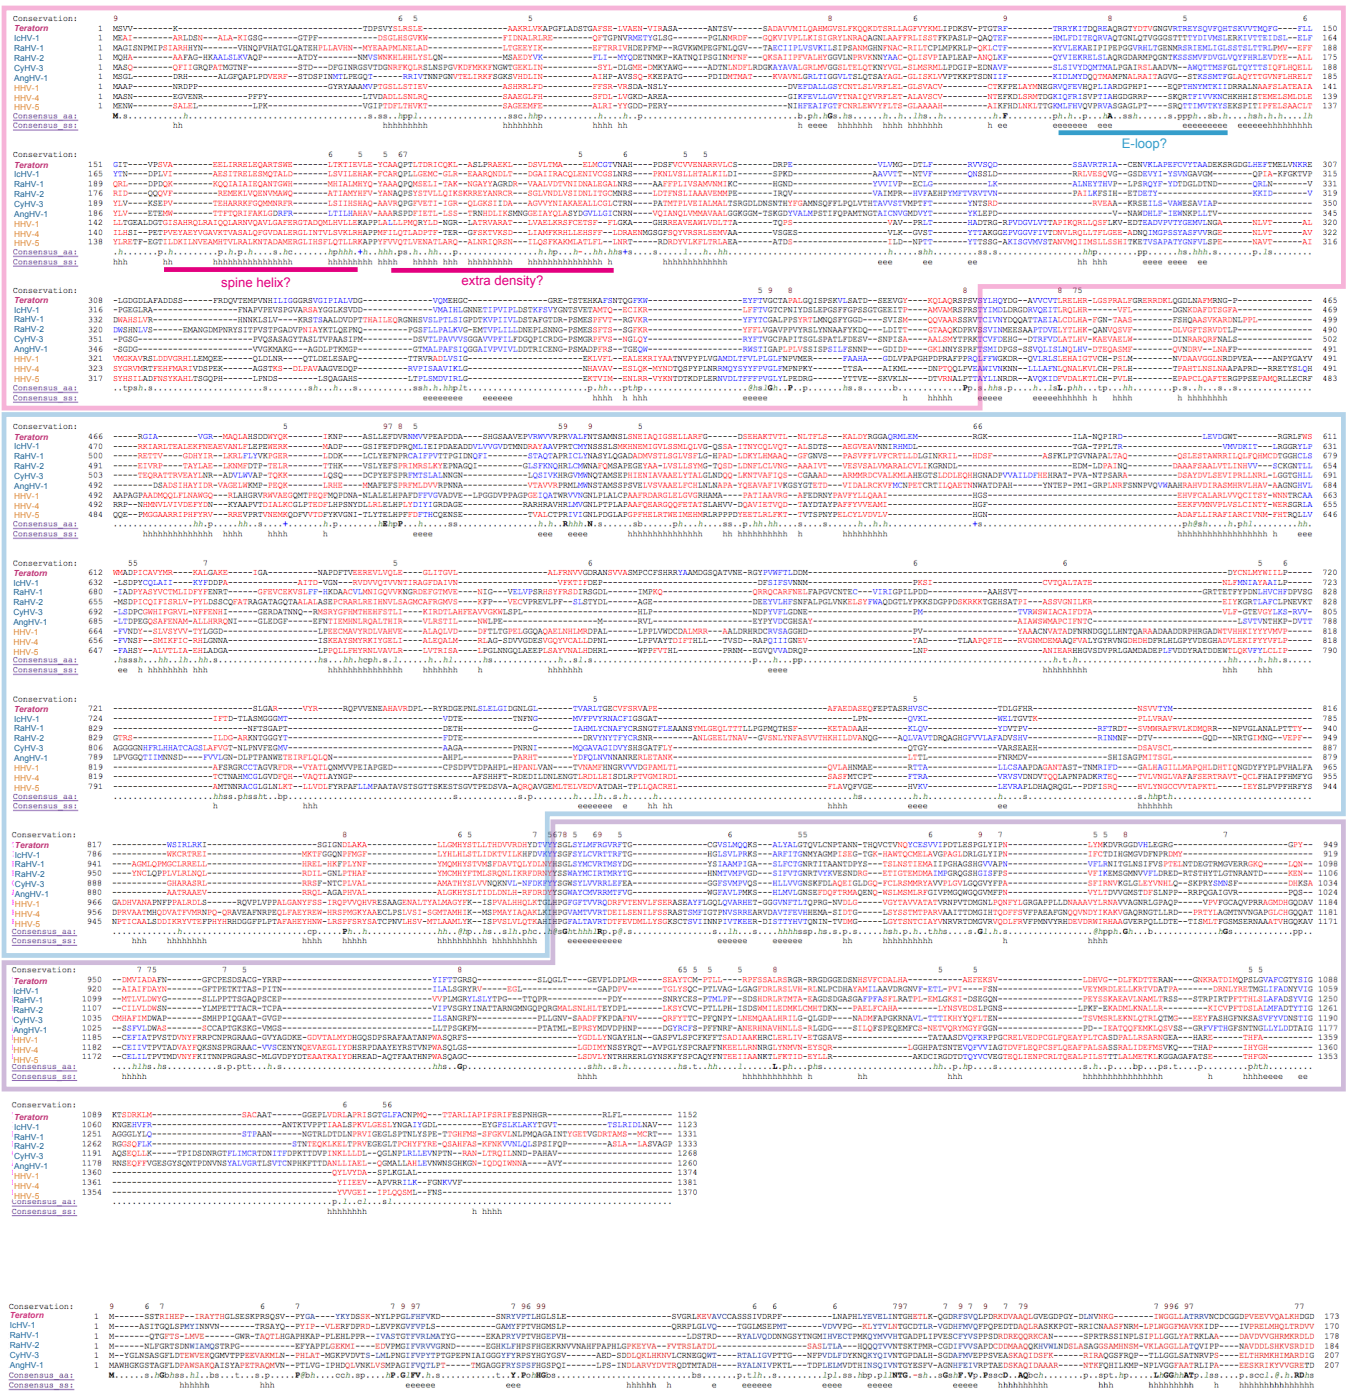

b

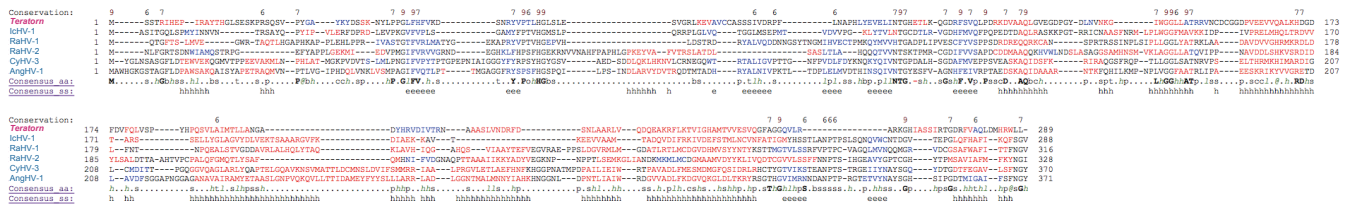

Red : alpha-helix Blue : beta-strand

**Supplementary Figure 10 | Similar secondary structure pattern of capsid proteins between herpesviruses and *Teratorn*.** (a) Multiple alignment of the full-length amino acid sequences of major capsid protein, constructed by PROMALS3D<sup>61</sup> (*Teratorn*, magenta; *Alloherpesviridae*, blue; *Herpesviridae*, yellow). Predicted secondary structures are depicted as red ( $\alpha$ -helix) and blue ( $\beta$ -strand). Herpesvirus major capsid proteins are known to be subdivided into three domains; Floor domain, which faces at the lumen of the capsid (pink), Upper domain, which faces at the outer surface of the capsid (blue), and Middle domain, which locates in the middle (purple)<sup>33</sup>. Although sequence similarity was low, similar pattern of secondary structure was observed. (b) Multiple alignment of the full-length sequence of subunit 2 capsid triplex protein of *Teratorn* (magenta) and alloherpesvirus species (blue). Note the sequence similarity among them.

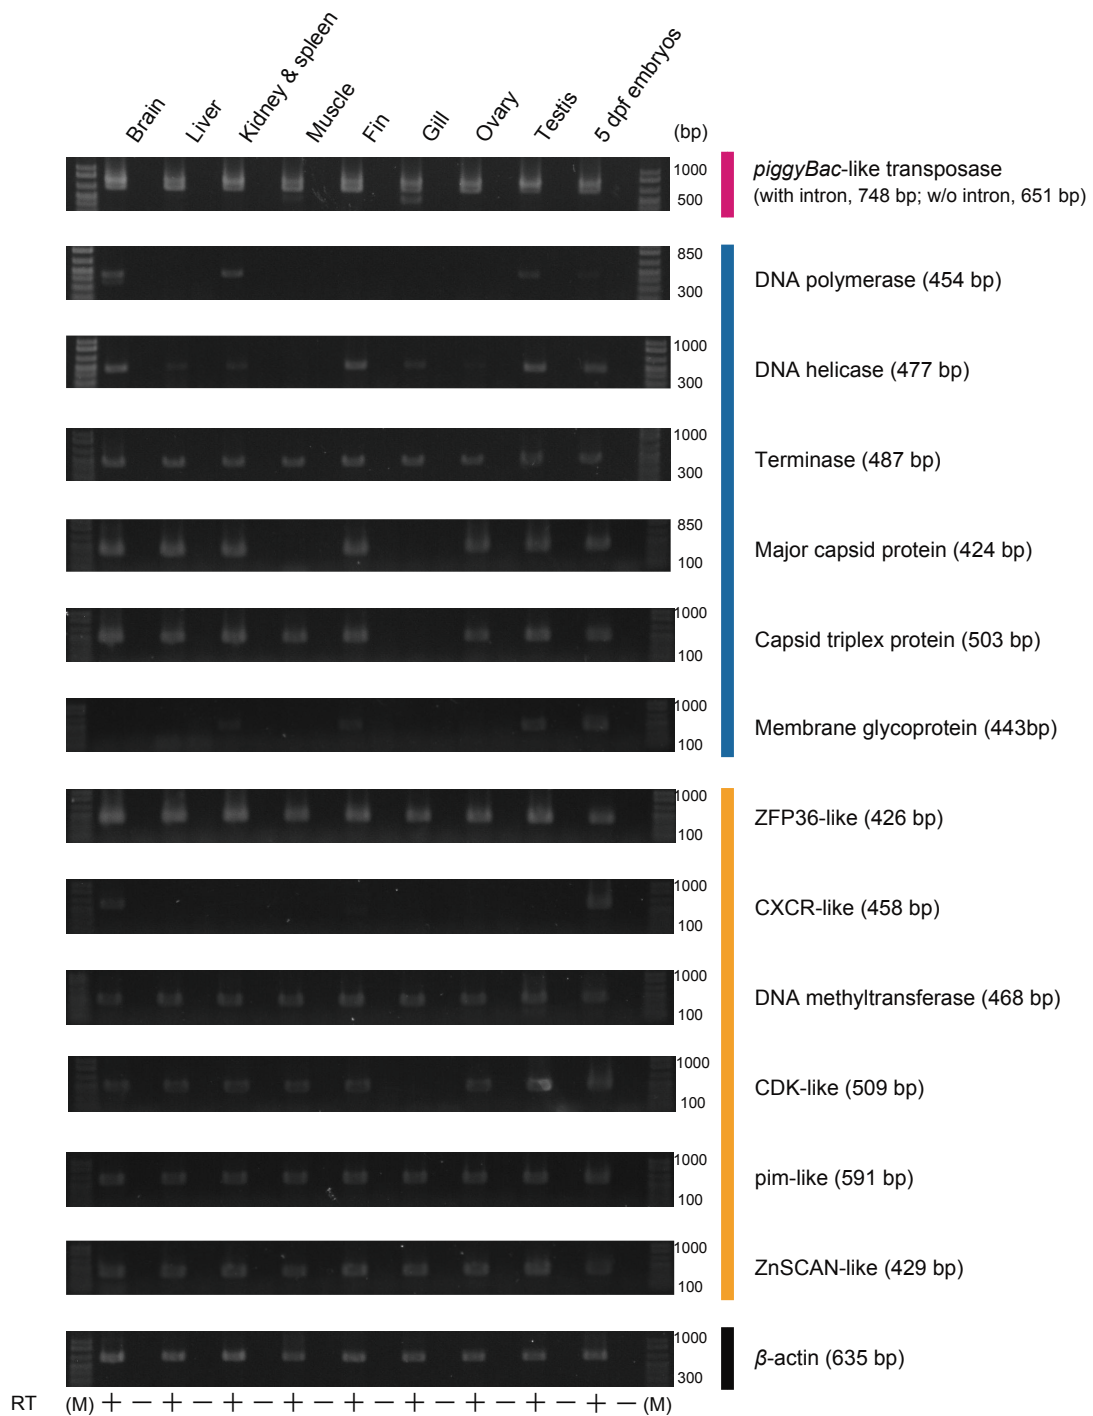

**Supplementary Figure 11 | Expression of *Teratorn* genes in several medaka tissues.** RT-PCR of *Teratorn* genes in several adult medaka tissues and 5 dpf medaka embryos. “+” and “-” indicate whether the reverse-transcription reaction was carried out or not, respectively. PCR amplification was repeated for 40 cycles.

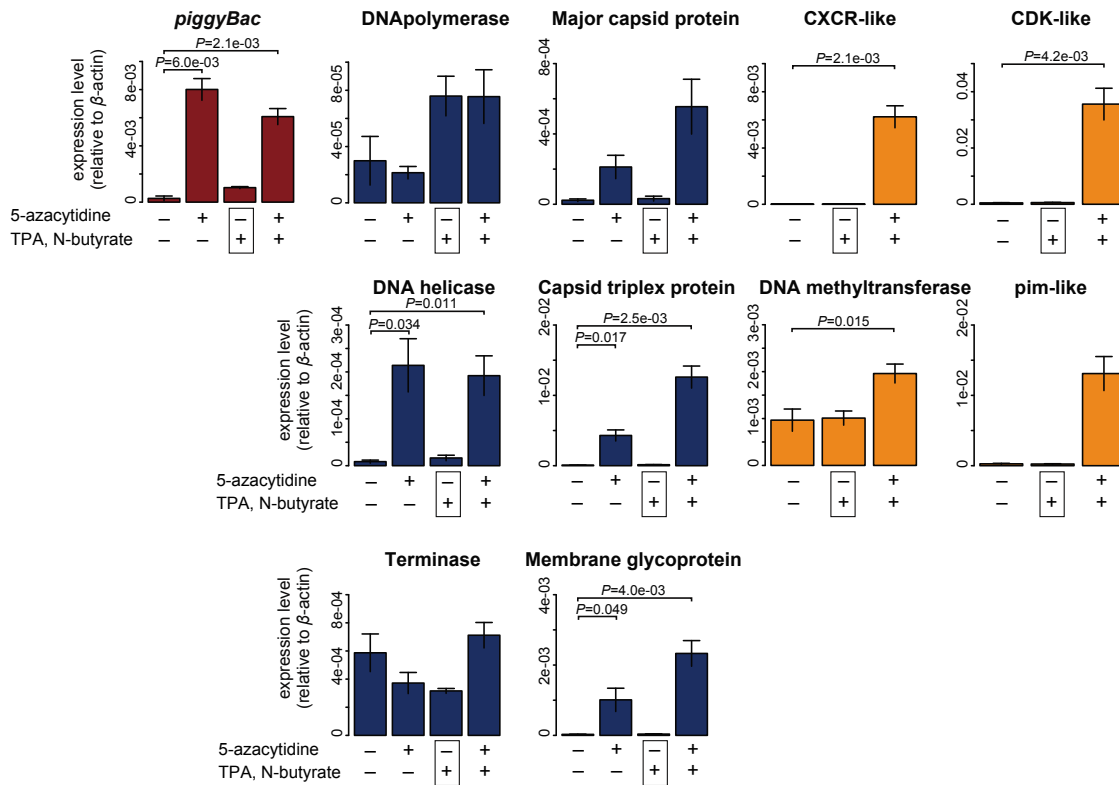

**Supplementary Figure 12 | TPA and N-butyrates alone don't reactivate *Teratorn* genes.** qPCR analysis of *Teratorn* genes in medaka fibroblast cells administered with or without 2 $\mu$ M of 5-azacytidine, 3mM of N-butyrates and 500ng ml<sup>-1</sup> of 12-*O*-Tetradecanoylphorbol 13-acetate (TPA), same as the results presented in Fig. 4c. “+” and “-” indicate that each chemical was administered or not. The value indicates the ratio of molar concentration relative to  $\beta$ -actin. Note that administration of TPA and N-butyrates didn't reactivate *Teratorn* genes in the absence of 5-azacytidine. Statistical significance was tested by one-sided Welch Two Sample t-test. Error bars indicate s.e.m. Numbers of replicates are as follows; n = 3 for no chemical treatment, n = 3 for 5-azacytidine treatment, n = 4 for TPA and N-butyrates treatment, n = 4 for 5-azacytidine, TPA and N-butyrates treatment.

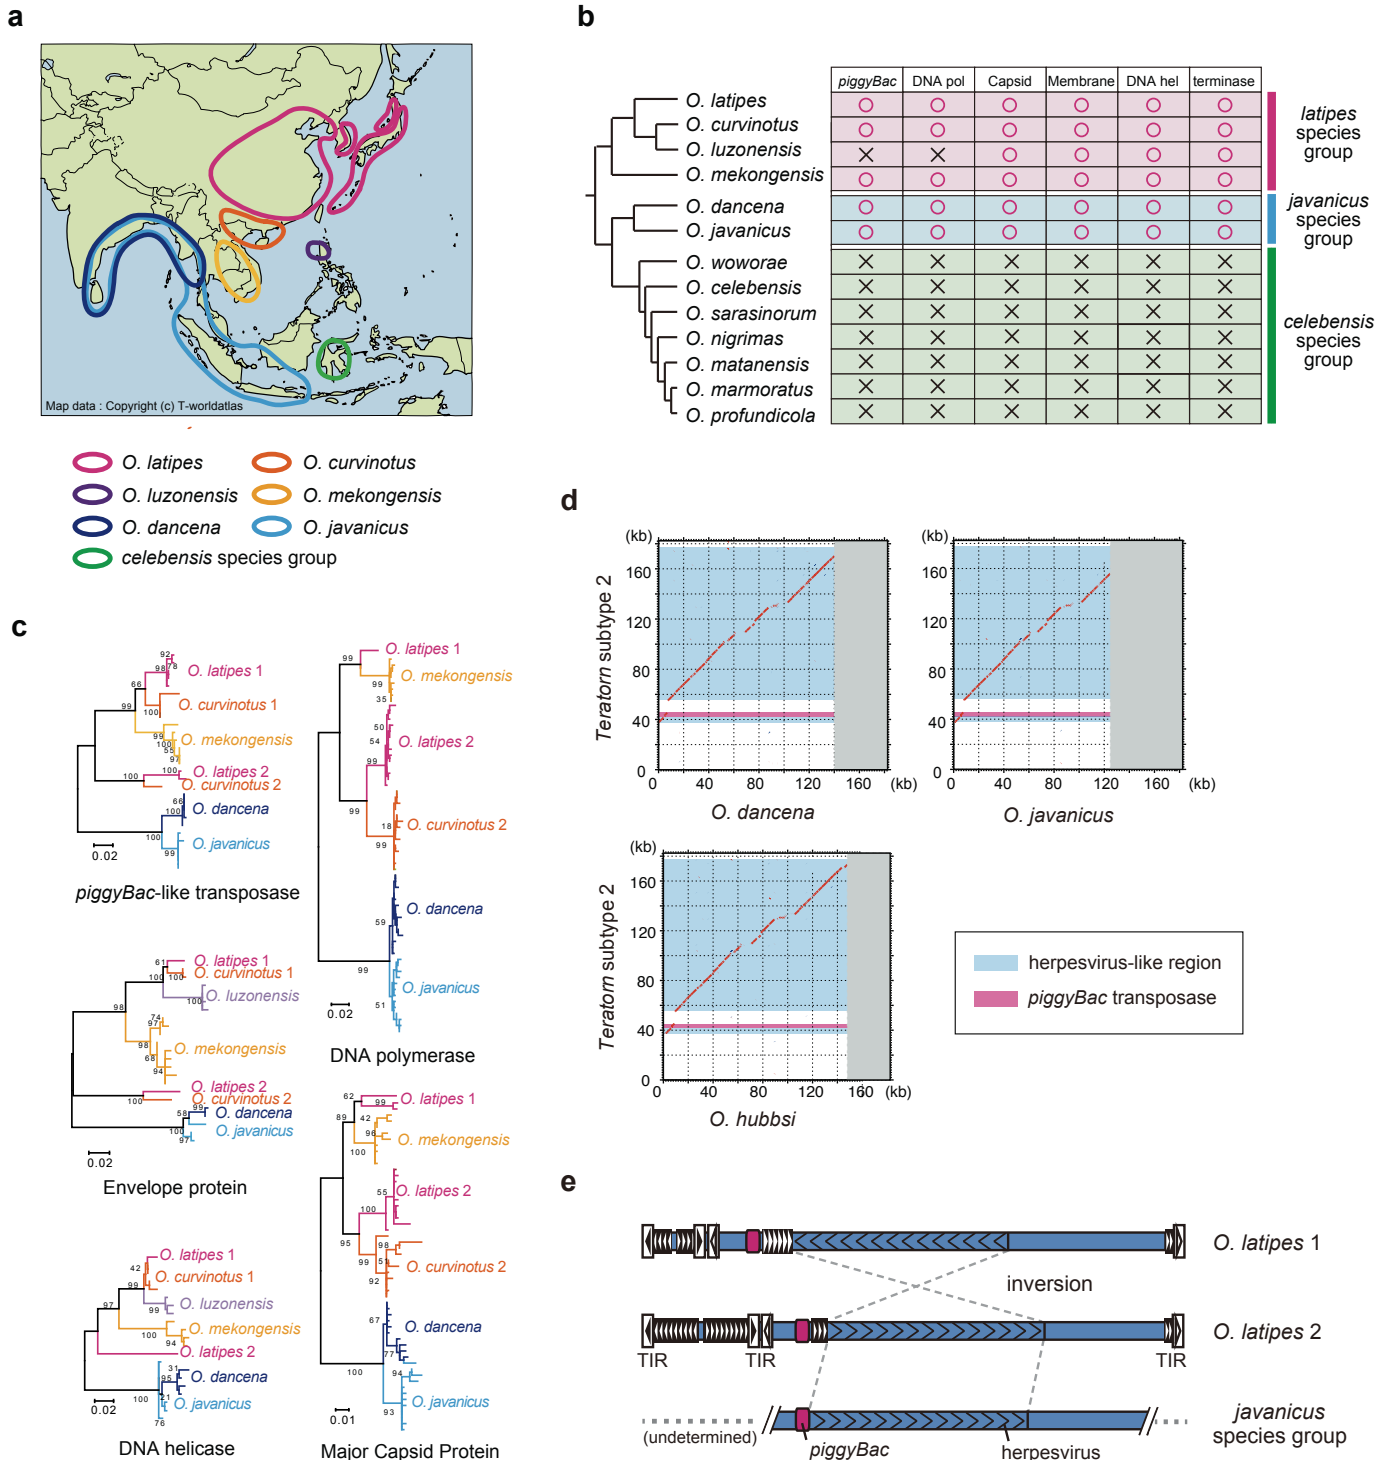

**Supplementary Figure 13 | Widespread colonization of *Teratorn* in *Oryzias* genus.** (a) Geographic distribution of medaka related species. (b) Results of PCR screening of six *Teratorn* genes in 13 medaka related species. Phylogenetic relationships of medaka related species used in this analysis are depicted on the left<sup>39</sup>. Note that *Teratorn* genes are detected in *latipes* and *javanicus* species group but not in *celebensis* species group. (c) Maximum-likelihood trees based on the sequences of subcloned PCR products of *Teratorn* genes from each medaka related species. Note that the topology of the phylogenetic trees of each gene are almost the same as that of host species, except for the existence of two subtypes of *Teratorn* in *latipes* species group. The scale bar represents the number of substitutions per site. (d) Dot plots showing the alignment of *Teratorn* in medaka species of *javanicus* species group with subtype 2 *Teratorn* in *O. latipes*. *piggyBac*-like transposase gene and herpesvirus-like region are shown in magenta and cyan, respectively. (e) Comparison of the structure of *Teratorn* in *Oryzias* genus. Note that gene synteny, including the position of the *piggyBac* transposase gene, is conserved in the *Oryzias* genus.

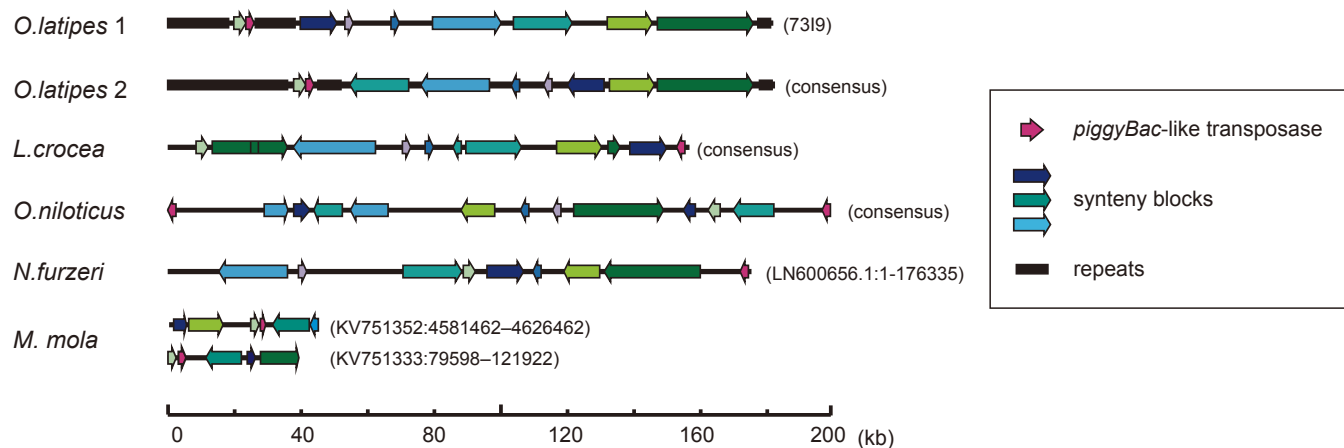

**Supplementary Figure 14 | Identification of *Teratorn*-like elements in teleosts.** Structures of *Teratorn*-like elements in several teleost fish species, in which *piggyBac*-herpesvirus fusion was suggested. Those sequences were (1) extracted from contigs or scaffolds (*N. furzeri* and *M. mola*) or (2) reconstructed by conjugating several contigs (*L. crocea* and *O. niloticus*). Conserved syntenic blocks are depicted by arrows of the same colors. Magenta arrows indicate *piggyBac*-like transposase.

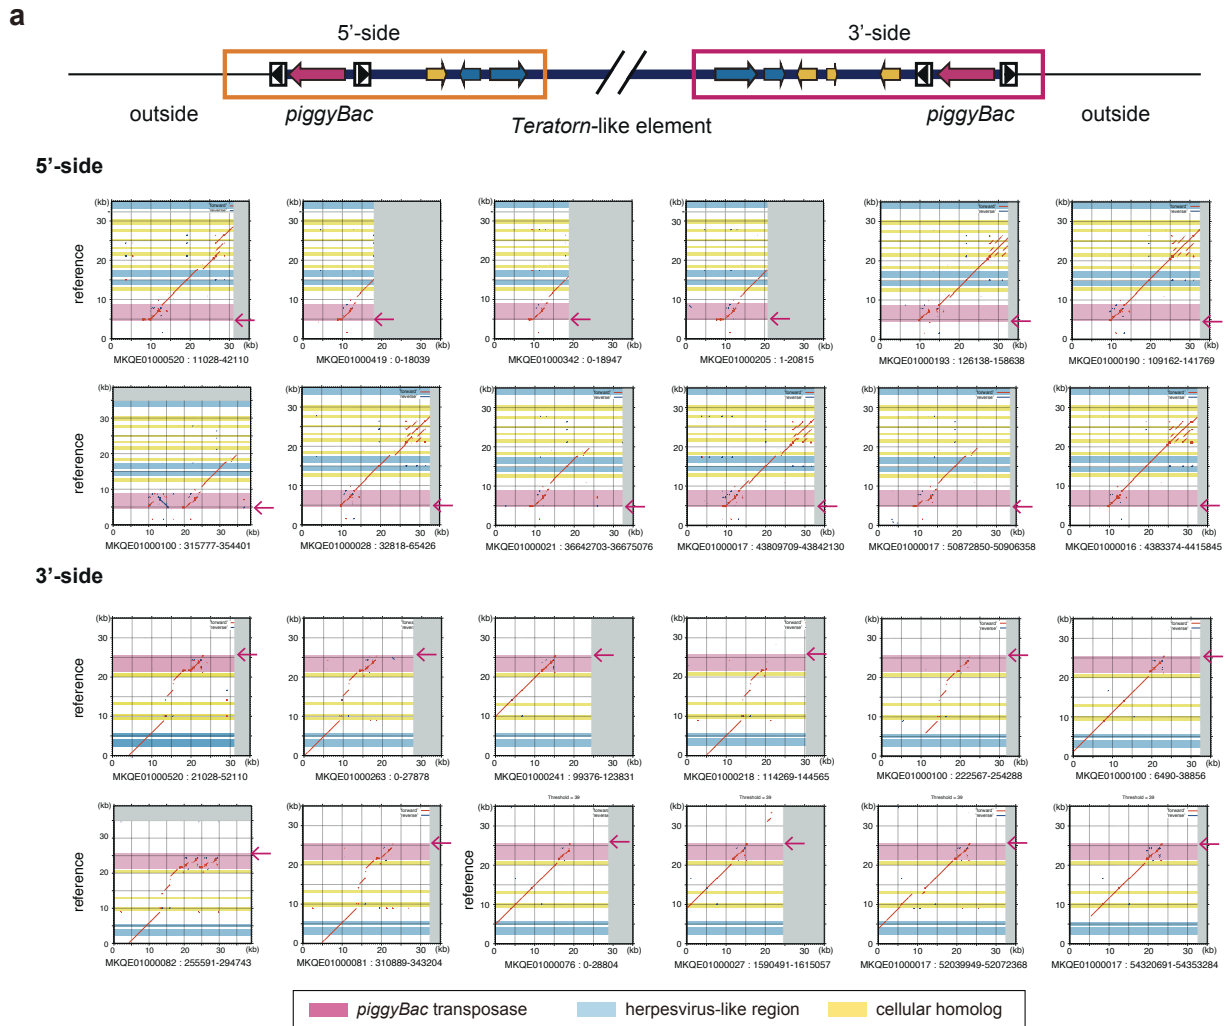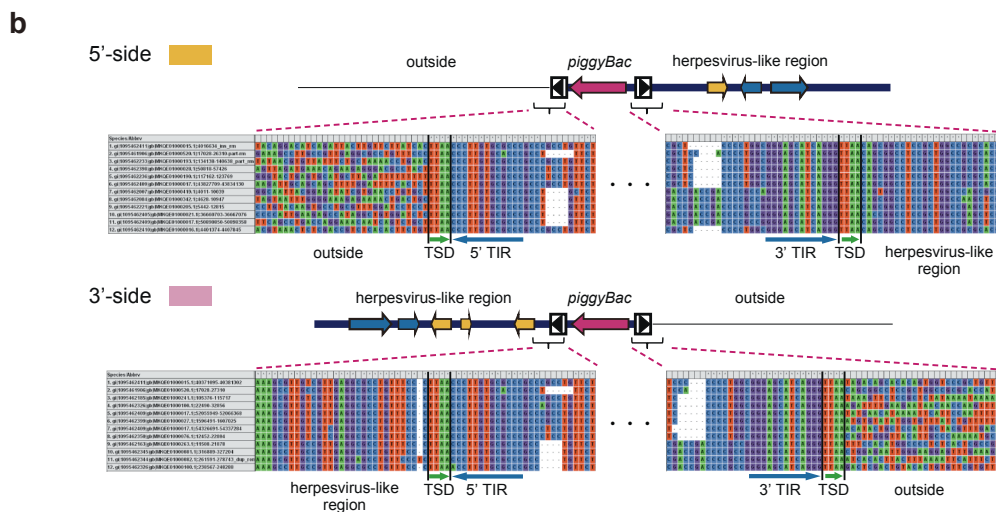

**Supplementary Figure 15 | TIR of *piggyBac* transposon is located at the boundary of *Teratorn*-like elements in Nile tilapia. (a)** Dot plots showing the alignment of terminal region of one copy of *Teratorn*-like element (5' end, MKQE01000015.1:40163261–4094943 (the copy-specific insertion (40171174–40177855) was removed); 3' end, MKQE01000015.1:40353261–40388260) and other copies obtained by blast. Magenta, blue and yellow region indicate the *piggyBac*, herpesvirus genes and cellular homologues, respectively. Note that sequence conservation was seen only interior to the *piggyBac* transposon, and the boundary corresponds to the position of terminal inverted repeat (magenta arrows). **(b)** Multiple alignments of *piggyBac* transposon copies adjacent to the herpesvirus-like region (5' side, 12 loci; 3' side, 12 loci). Terminal region of *piggyBac* transposon is displayed. Note that sequences are almost identical from the 5' TIR (terminal inverted repeat) of the 5'-side *piggyBac* to the 3' TIR of the 3'-side *piggyBac*, while no sequence similarity is found outside, suggesting the transposition of *Teratorn*-like element via *piggyBac* of both ends. TSD: target site duplication.



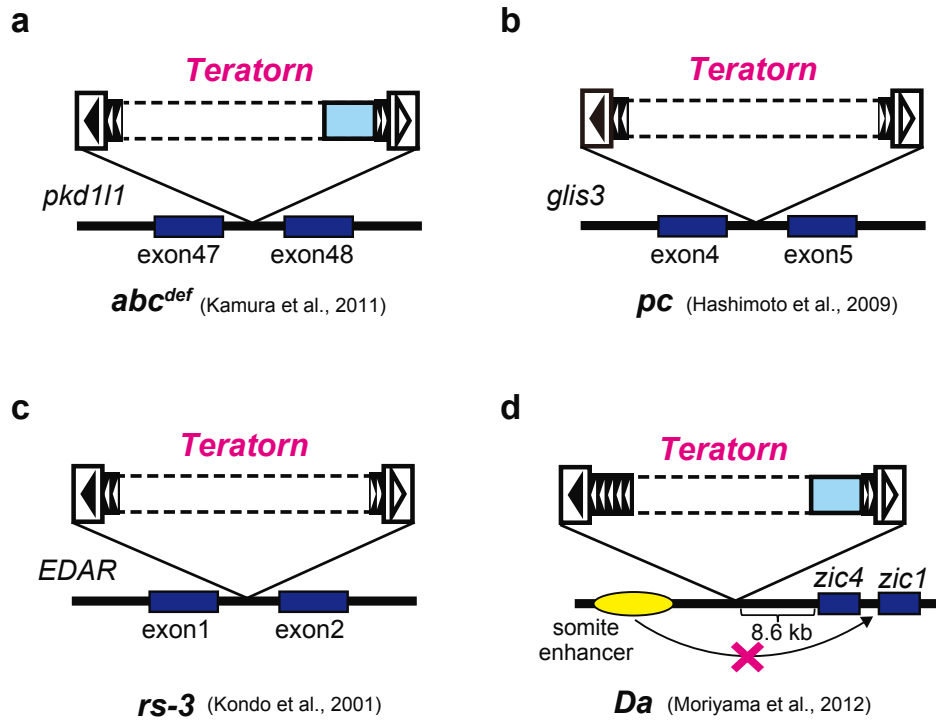

**Supplementary Figure 16 | Medaka spontaneous mutants caused by *Teratorn* insertion. (a) *abc<sup>def</sup>* mutant (defect in left-right axis formation)<sup>43</sup>. (b) *pc* mutant (polycystic kidney disease)<sup>42</sup>. (c) *rs-3* mutant (loss of scales)<sup>41</sup>. (d) *Da* mutant (ventralization of dorsal trunk morphology)<sup>12</sup>. Solid and dotted boxes inside *Teratorn* indicate the sequence-determined and undetermined region, respectively.**

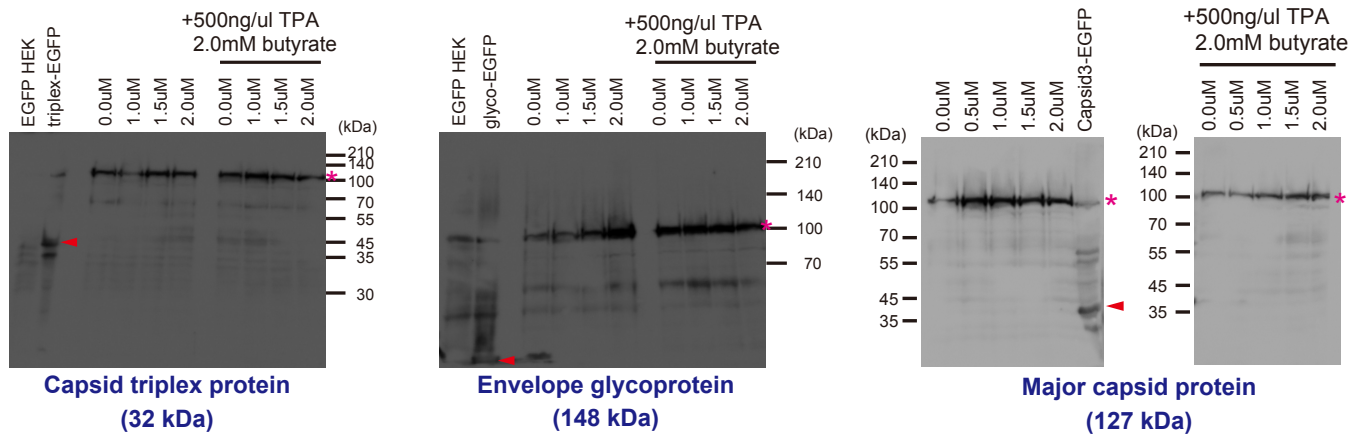

**Supplementary Figure 17 | No virus structural protein production after administration of 5-azacytidine, TPA and N-butyrate in medaka fibroblasts.** Western blot of the lysate of medaka fibroblasts administered with 5-azacytidine, TPA and N-butyrate for the presence of three herpesvirus structural proteins (capsid triplex protein, envelope glycoprotein and major capsid protein) of *Teratorn*. Arrowheads indicate the positive control; lysate of cells transfected with the plasmids that express the antigen protein fragment fused with GFP. Note that no clear signal was observed at the corresponding molecular weight for each gene. Asterisks indicate a non-specific signal.

# Supplementary Tables

## Supplementary Table 1 | Predicted ORFs inside *Teratorn* subtype 1

| Gene         | properties or putative functions                                       | Evalue           | start                                | end             | direction    | IcHV-1       |                  | CyHV-3        |                 | RaHV-1       |                 |
|--------------|------------------------------------------------------------------------|------------------|--------------------------------------|-----------------|--------------|--------------|------------------|---------------|-----------------|--------------|-----------------|
|              |                                                                        |                  |                                      |                 |              | ORF          | Evalue           | ORF           | Evalue          | ORF          | Evalue          |
| ORF1         | myogenic factor MyoD2 ( <i>O. niloticus</i> )                          | 0.005            | 3689                                 | 4048            | +            |              |                  |               |                 |              |                 |
| ORF2         |                                                                        |                  | 8022                                 | 8630            | +            |              |                  |               |                 |              |                 |
| ORF3         |                                                                        |                  | 12667                                | 13026           | -            |              |                  |               |                 |              |                 |
| ORF4         |                                                                        |                  | 13388                                | 13702           | -            |              |                  |               |                 |              |                 |
| ORF5         |                                                                        |                  | 19344                                | 20096           | -            |              |                  |               |                 |              |                 |
| <b>ORF6</b>  | <b>ORF60</b>                                                           | <b>9.00E-22</b>  | <b>20228</b>                         | <b>21406</b>    | <b>+</b>     | <b>ORF60</b> | <b>9.00E-22</b>  | <b>ORF80L</b> | <b>6.00E-04</b> | <b>ORF84</b> | <b>5.00E-08</b> |
| <b>ORF7</b>  | <b>ORF54</b>                                                           | <b>6.00E-05</b>  | <b>21471</b>                         | <b>23450</b>    | <b>+</b>     | <b>ORF54</b> | <b>6.00E-05</b>  | <b>ORF61</b>  | <b>-</b>        | <b>ORF75</b> | <b>-</b>        |
| <b>ORF8</b>  | <b>piggyBac-like transposase</b>                                       | <b>0</b>         | <b>23875</b>                         | <b>26466</b>    | <b>+</b>     |              |                  |               |                 |              |                 |
| ORF9         |                                                                        |                  | 29685                                | 30569           | -            |              |                  |               |                 |              |                 |
| <b>ORF10</b> | <b>ORF56</b>                                                           | <b>4.00E-41</b>  | <b>40287</b>                         | <b>44351</b>    | <b>-</b>     | <b>ORF56</b> | <b>1.00E-40</b>  | <b>ORF107</b> | <b>2.00E-18</b> | <b>ORF73</b> | <b>2.00E-33</b> |
| <b>ORF11</b> | <b>DNA polymerase</b>                                                  | <b>2.00E-111</b> | <b>45181</b>                         | <b>50085</b>    | <b>+</b>     | <b>ORF57</b> | <b>2.00E-111</b> | <b>ORF79</b>  | <b>7.00E-57</b> | <b>ORF72</b> | <b>6.00E-73</b> |
| ORF12        | OTU-like cysteine protease domain ( <i>C. semilaevis</i> )             | 2.00E-35         | 50203                                | 51330           | +            |              |                  |               |                 |              |                 |
| ORF13        |                                                                        |                  | 51603                                | 53297           | -            |              |                  |               |                 |              |                 |
| ORF14        |                                                                        |                  | 54098                                | 54694           | +            |              |                  |               |                 |              |                 |
| ORF15        |                                                                        |                  | 55227                                | 56054           | -            |              |                  |               |                 |              |                 |
| <b>ORF16</b> |                                                                        |                  | <b>ORF73_protein kinase (IcHV-1)</b> | <b>4.00E-09</b> | <b>56053</b> | <b>58443</b> | <b>+</b>         | <b>ORF73</b>  | <b>4.00E-09</b> |              |                 |
| ORF17        |                                                                        |                  | 58410                                | 59327           | +            |              |                  |               |                 |              |                 |
| ORF18        | CD276 antigen-like ( <i>O. latipes</i> )                               | 8.00E-32         | 59157                                | 61143           | +            |              |                  |               |                 |              |                 |
| ORF19        | CD276 antigen-like ( <i>H. burtoni</i> )                               | 1.00E-19         | 62103                                | 63705           | +            |              |                  |               |                 |              |                 |
| ORF20        |                                                                        |                  | 64024                                | 64353           | -            |              |                  |               |                 |              |                 |
| ORF21        | HERV-H LTR-associating protein 2-like ( <i>P. nyererei</i> )           | 1.00E-17         | 64751                                | 65805           | +            |              |                  |               |                 |              |                 |
| ORF22        |                                                                        |                  | 66376                                | 70044           | -            |              |                  |               |                 |              |                 |
| ORF23        | mcl-1 ( <i>O. mykiss</i> )                                             | 1.00E-19         | 70917                                | 71457           | +            |              |                  |               |                 |              |                 |
| ORF24        | CDK2 ( <i>L. crocea</i> )                                              | 2.00E-80         | 71862                                | 72749           | +            |              |                  |               |                 |              |                 |
| ORF25        | zinc finger protein 36, C3H1 type-like 2 ( <i>S. partitus</i> )        | 2.00E-20         | 74275                                | 75075           | +            |              |                  |               |                 |              |                 |
| ORF26        | integrase / recombinase ( <i>Vibrio splendidus</i> )                   | 0.011            | 74362                                | 74691           | -            |              |                  |               |                 |              |                 |
| ORF27        |                                                                        |                  | 75467                                | 76012           | -            |              |                  |               |                 |              |                 |
| ORF28        | CAP-Gly domain containing linker protein 1-like ( <i>S. partitus</i> ) | 0.02             | 76476                                | 79142           | -            |              |                  |               |                 |              |                 |
| ORF29        |                                                                        |                  | 78757                                | 80472           | -            |              |                  |               |                 |              |                 |
| ORF30        |                                                                        |                  | 81622                                | 82077           | -            |              |                  |               |                 |              |                 |
| <b>ORF31</b> | <b>ORF44</b>                                                           | <b>8.00E-18</b>  | <b>82121</b>                         | <b>83569</b>    | <b>-</b>     | <b>ORF44</b> | <b>8.00E-18</b>  |               |                 | <b>ORF59</b> | <b>3.00E-05</b> |
| ORF32        |                                                                        |                  | 83417                                | 86155           | +            |              |                  |               |                 |              |                 |
| ORF33        |                                                                        |                  | 86700                                | 87455           | -            |              |                  |               |                 |              |                 |
| ORF34        |                                                                        |                  | 87418                                | 88338           | +            |              |                  |               |                 |              |                 |
| <b>ORF35</b> | <b>ORF34</b>                                                           | <b>7.00E-50</b>  | <b>88079</b>                         | <b>89569</b>    | <b>+</b>     | <b>ORF34</b> | <b>4.00E-43</b>  |               |                 | <b>ORF49</b> | <b>5.00E-31</b> |
| ORF36        |                                                                        |                  | 89566                                | 90429           | +            |              |                  |               |                 |              |                 |
| ORF37        |                                                                        |                  | 91720                                | 92091           | -            |              |                  |               |                 |              |                 |
| <b>ORF38</b> | <b>ORF37</b>                                                           | <b>6.00E-08</b>  | <b>92640</b>                         | <b>94820</b>    | <b>-</b>     | <b>ORF37</b> | <b>3.00E-04</b>  | <b>ORF90L</b> | <b>0.53</b>     | <b>ORF52</b> | <b>-</b>        |
| ORF39        |                                                                        |                  | 94944                                | 95378           | +            |              |                  |               |                 |              |                 |
| <b>ORF40</b> | <b>Major capsid protein</b>                                            | <b>1.00E-22</b>  | <b>95469</b>                         | <b>98927</b>    | <b>+</b>     | <b>ORF39</b> | <b>8.00E-21</b>  | <b>ORF92</b>  | <b>0.059</b>    | <b>ORF54</b> | <b>2.00E-10</b> |
| ORF41        |                                                                        |                  | 99000                                | 99578           | +            |              |                  |               |                 |              |                 |
| ORF42        | diguanylate cyclase ( <i>Firmicutes bacterium</i> )                    | 0.024            | 100296                               | 101141          | -            |              |                  |               |                 |              |                 |
| ORF43        |                                                                        |                  | 101152                               | 101997          | -            |              |                  |               |                 |              |                 |
| ORF44        |                                                                        |                  | 102065                               | 103342          | -            |              |                  |               |                 |              |                 |
| <b>ORF45</b> | <b>Membrane glycoprotein</b>                                           | <b>2.00E-89</b>  | <b>104618</b>                        | <b>108688</b>   | <b>-</b>     | <b>ORF46</b> | <b>6.00E-71</b>  | <b>ORF99</b>  | <b>1.00E-07</b> | <b>ORF46</b> | <b>1.00E-08</b> |
| ORF46        |                                                                        |                  | 108803                               | 109411          | -            |              |                  |               |                 |              |                 |
| ORF47        | myopalladin, partial, ( <i>O. latipes</i> )                            | 4.00E-20         | 109609                               | 110190          | +            |              |                  |               |                 |              |                 |
| <b>ORF48</b> | <b>Capsid maturation protease</b>                                      | <b>5.00E-13</b>  | <b>110276</b>                        | <b>112294</b>   | <b>+</b>     | <b>ORF28</b> | <b>1.00E-08</b>  | <b>ORF78</b>  | <b>-</b>        | <b>ORF63</b> | <b>0.006</b>    |
| ORF49        | unnamed protein ( <i>O. mykiss</i> )                                   | 5.00E-29         | 112609                               | 113673          | +            |              |                  |               |                 |              |                 |
| ORF50        |                                                                        |                  | 113800                               | 114390          | +            |              |                  |               |                 |              |                 |
| ORF51        |                                                                        |                  | 114397                               | 114924          | +            |              |                  |               |                 |              |                 |
| ORF52        |                                                                        |                  | 114956                               | 115129          | +            |              |                  |               |                 |              |                 |
| ORF53        | thiopurine S-methyltransferase ( <i>Pseudomonas fluorescens</i> )      | 0.027            | 115138                               | 115542          | +            |              |                  |               |                 |              |                 |
| ORF54        | zinc finger BED domain-containing protein 4 ( <i>L. crocea</i> )       | 2.00E-27         | 115680                               | 116837          | +            |              |                  |               |                 |              |                 |

**Supplementary Table 1 Continued**

| Gene         | properties or putative functions                                     | Evalue          | start         | end           | direction | IcHV-1       |                 | CyHV-3        |                 | RaHV-1       |                 |
|--------------|----------------------------------------------------------------------|-----------------|---------------|---------------|-----------|--------------|-----------------|---------------|-----------------|--------------|-----------------|
|              |                                                                      |                 |               |               |           | ORF          | Evalue          | ORF           | Evalue          | ORF          | Evalue          |
| <b>ORF55</b> | <b>Capsid triplex protein subunit 2</b>                              | <b>4.00E-05</b> | <b>117519</b> | <b>118388</b> | -         | <b>ORF27</b> | <b>1.00E-04</b> | <b>ORF72</b>  | -               | <b>ORF95</b> | -               |
| ORF56        |                                                                      |                 | 118445        | 118855        | -         |              |                 |               |                 |              |                 |
| <b>ORF57</b> | <b>DNA helicase (UL9 homolog)</b>                                    | <b>2.00E-47</b> | <b>118921</b> | <b>120687</b> | -         | <b>ORF25</b> | <b>7.00E-25</b> | <b>ORF71</b>  | <b>2.00E-35</b> | <b>ORF93</b> | <b>3.00E-26</b> |
| ORF58        |                                                                      |                 | 120719        | 121948        | -         |              |                 |               |                 |              |                 |
| ORF59        | putative permease YjgP/YjgQ family protein (E. coli)                 | 2.00E-12        | 123657        | 124283        | +         |              |                 |               |                 |              |                 |
| ORF60        | zinc finger and SCAN domain-containing protein 29 (A. platyrhynchos) | 2.00E-18        | 124919        | 125347        | -         |              |                 |               |                 |              |                 |
| ORF61        | type-2 angiotensin II receptor-like cxcr (O. afer)                   | 3.00E-13        | 126419        | 127532        | -         |              |                 |               |                 |              |                 |
| ORF62        |                                                                      |                 | 127937        | 129121        | +         |              |                 |               |                 |              |                 |
| ORF63        | 75-interferon_induced_dsRNA_activated protein kinase (H. microstoma) | 1.00E-07        | 129414        | 130175        | +         |              |                 |               |                 |              |                 |
| ORF64        |                                                                      |                 | 130819        | 131172        | -         |              |                 |               |                 |              |                 |
| ORF65        |                                                                      |                 | 132599        | 133129        | -         |              |                 |               |                 |              |                 |
| <b>ORF66</b> | <b>ORF57R (CyHV-3)</b>                                               | <b>5.00E-10</b> | <b>133776</b> | <b>134714</b> | -         |              |                 | <b>ORF57R</b> | <b>1.00E-10</b> |              |                 |
| ORF67        |                                                                      |                 | 135058        | 135489        | -         |              |                 |               |                 |              |                 |
| ORF68        |                                                                      |                 | 135683        | 137212        | -         |              |                 |               |                 |              |                 |
| ORF69        |                                                                      |                 | 137209        | 140187        | -         |              |                 |               |                 |              |                 |
| ORF70        | DNA methyltransferase (Lymphocystis disease virus 1)                 | 7.00E-07        | 140334        | 141221        | +         |              |                 |               |                 |              |                 |
| <b>ORF71</b> | <b>Primase</b>                                                       | <b>1.00E-14</b> | <b>141798</b> | <b>144128</b> | -         | <b>ORF63</b> | <b>1.00E-11</b> | <b>ORF46</b>  | <b>9.00E-04</b> | <b>ORF87</b> | <b>1.00E-08</b> |
| ORF72        |                                                                      |                 | 144317        | 144970        | -         |              |                 |               |                 |              |                 |
| <b>ORF73</b> | <b>DNA packaging terminase subunit 1</b>                             | <b>4.00E-41</b> | <b>145083</b> | <b>146207</b> | -         | <b>ORF62</b> | <b>4.00E-41</b> | <b>ORF33</b>  | <b>9.00E-27</b> | <b>ORF42</b> | <b>1.00E-21</b> |
| ORF74        |                                                                      |                 | 146149        | 147051        | +         |              |                 |               |                 |              |                 |
| ORF75        |                                                                      |                 | 147148        | 147954        | +         |              |                 |               |                 |              |                 |
| ORF76        |                                                                      |                 | 148268        | 148777        | +         |              |                 |               |                 |              |                 |
| <b>ORF77</b> | <b>DNA packaging terminase subunit 1</b>                             | <b>2.00E-12</b> | <b>149071</b> | <b>149904</b> | -         | <b>ORF62</b> | <b>1.00E-09</b> | <b>ORF33</b>  | <b>5.00E-05</b> |              |                 |
| ORF78        | cbp_p300-interacting transactivator (L. crocea)                      | 9.00E-90        | 149947        | 150927        | +         |              |                 |               |                 |              |                 |
| ORF79        | ORF70 (RaHV-2)                                                       | 0.69            | 151279        | 152451        | +         |              |                 |               |                 |              |                 |
| ORF80        |                                                                      |                 | 152882        | 153208        | -         |              |                 |               |                 |              |                 |
| <b>ORF81</b> | <b>ORF64</b>                                                         | <b>9.00E-13</b> | <b>153189</b> | <b>154802</b> | -         | <b>ORF64</b> | <b>9.00E-13</b> | <b>ORF47</b>  | -               | <b>ORF88</b> | -               |
| ORF82        |                                                                      |                 | 154685        | 160591        | -         |              |                 |               |                 |              |                 |
| ORF83        |                                                                      |                 | 160679        | 162142        | +         |              |                 |               |                 |              |                 |
| ORF84        |                                                                      |                 | 162226        | 166377        | +         |              |                 |               |                 |              |                 |
| ORF85        |                                                                      |                 | 166751        | 171127        | -         |              |                 |               |                 |              |                 |
| ORF86        |                                                                      |                 | 171416        | 172927        | -         |              |                 |               |                 |              |                 |
| ORF87        |                                                                      |                 | 173599        | 174402        | +         |              |                 |               |                 |              |                 |
| ORF88        | serine/threonine-protein kinase pim3 (A. mexicanus)                  | 8.00E-76        | 175073        | 176215        | +         |              |                 |               |                 |              |                 |
| ORF89        | chloride channel CLIC-like, partial (S. salar)                       | 6.00E-07        | 180402        | 180593        | -         |              |                 |               |                 |              |                 |

**Supplementary Table 2 | Predicted ORFs inside *Teratorn* subtype 2**

| Gene         | properties or putative functions                             | Evalue          | start        | end          | direction | IcHV-1       |                 | CyHV-3        |                 | RaHV-1       |                 |
|--------------|--------------------------------------------------------------|-----------------|--------------|--------------|-----------|--------------|-----------------|---------------|-----------------|--------------|-----------------|
|              |                                                              |                 |              |              |           | ORF          | Evalue          | ORF           | Evalue          | ORF          | Evalue          |
| ORF1L        | HAF repeat protein (G. daltonii)                             | 0.01            | 2018         | 2494         | -         |              |                 |               |                 |              |                 |
| ORF2L        | signal-inducel proliferation-associated 1-like (S. formosus) | 3.00E-10        | 5267         | 5791         | -         |              |                 |               |                 |              |                 |
| ORF3L        |                                                              |                 | 5790         | 6113         | +         |              |                 |               |                 |              |                 |
| ORF4L        |                                                              |                 | 10039        | 10425        | +         |              |                 |               |                 |              |                 |
| ORF5L        |                                                              |                 | 11281        | 11604        | +         |              |                 |               |                 |              |                 |
| ORF6L        | RNA-directed DNA polymerase from jockey (L. crocea)          | 2.00E-08        | 16049        | 16435        | -         |              |                 |               |                 |              |                 |
| ORF7         | RNA-directed DNA polymerase from jockey (A. queenslandica)   | 3.00E-11        | 18387        | 19124        | +         |              |                 |               |                 |              |                 |
| ORF6R        | RNA-directed DNA polymerase from jockey (L. crocea)          | 2.00E-08        | 19368        | 19754        | +         |              |                 |               |                 |              |                 |
| ORF5R        |                                                              |                 | 24136        | 24522        | -         |              |                 |               |                 |              |                 |
| ORF4R        |                                                              |                 | 25378        | 25764        | -         |              |                 |               |                 |              |                 |
| ORF3R        |                                                              |                 | 29690        | 30013        | -         |              |                 |               |                 |              |                 |
| ORF2R        | signal-inducel proliferation-associated 1-like (S. formosus) | 3.00E-10        | 30012        | 30536        | +         |              |                 |               |                 |              |                 |
| ORF1R        | HAF repeat protein (G. daltonii)                             | 0.01            | 33288        | 33764        | +         |              |                 |               |                 |              |                 |
| ORF8         |                                                              |                 | 37404        | 38168        | -         |              |                 |               |                 |              |                 |
| <b>ORF9</b>  | <b>ORF60</b>                                                 | <b>5.00E-23</b> | <b>38315</b> | <b>39529</b> | <b>+</b>  | <b>ORF60</b> | <b>5.00E-23</b> | <b>ORF80L</b> | <b>0.002</b>    | <b>ORF84</b> | <b>1.00E-05</b> |
| <b>ORF10</b> | <b>ORF54</b>                                                 | <b>0.004</b>    | <b>39927</b> | <b>41522</b> | <b>+</b>  | <b>ORF54</b> | <b>4.00E-03</b> | <b>ORF61</b>  | <b>-</b>        | <b>ORF75</b> | <b>-</b>        |
| <b>ORF11</b> | <b>piggyBac-like transposase</b>                             | <b>0.00E+00</b> | <b>41904</b> | <b>45337</b> | <b>+</b>  |              |                 |               |                 |              |                 |
| ORF12        | myogenic factor MyoD2 (C. mydas)                             | 2.00E-09        | 51877        | 52896        | +         |              |                 |               |                 |              |                 |
| ORF13        |                                                              |                 | 53663        | 54127        | +         |              |                 |               |                 |              |                 |
| ORF14        |                                                              |                 | 54981        | 56315        | +         |              |                 |               |                 |              |                 |
| <b>ORF15</b> | <b>DNA helicase (UL9 homolog)</b>                            | <b>4.00E-47</b> | <b>56356</b> | <b>58137</b> | <b>+</b>  | <b>ORF25</b> | <b>3.00E-25</b> | <b>ORF71R</b> | <b>7.00E-42</b> | <b>ORF93</b> | <b>1.00E-27</b> |
| ORF16        |                                                              |                 | 58213        | 58623        | +         |              |                 |               |                 |              |                 |
| <b>ORF17</b> | <b>Capsid triplex protein subunit 2</b>                      | <b>9.00E-05</b> | <b>58666</b> | <b>59535</b> | <b>+</b>  | <b>ORF27</b> | <b>5.00E-04</b> | <b>ORF72</b>  | <b>-</b>        | <b>ORF95</b> | <b>-</b>        |
| ORF18        |                                                              |                 | 59742        | 60131        | -         |              |                 |               |                 |              |                 |
| ORF19        | zinc finger BED domain-containing protein 4 (L. crocea)      | 2.00E-22        | 60205        | 60621        | -         |              |                 |               |                 |              |                 |
| ORF20        |                                                              |                 | 60613        | 61062        | +         |              |                 |               |                 |              |                 |
| ORF21        |                                                              |                 | 61707        | 62165        | -         |              |                 |               |                 |              |                 |
| ORF22        |                                                              |                 | 62382        | 62909        | -         |              |                 |               |                 |              |                 |
| ORF23        |                                                              |                 | 62916        | 63506        | -         |              |                 |               |                 |              |                 |
| ORF24        |                                                              |                 | 63630        | 64706        | -         |              |                 |               |                 |              |                 |
| <b>ORF25</b> | <b>Capsid maturation protease</b>                            | <b>6.00E-12</b> | <b>65049</b> | <b>67133</b> | <b>-</b>  | <b>ORF28</b> | <b>1.00E-09</b> | <b>ORF78</b>  | <b>-</b>        | <b>ORF63</b> | <b>8.00E-05</b> |
| ORF26        | myopalladin, partial (O. latipes)                            | 2.00E-09        | 67177        | 67761        | -         |              |                 |               |                 |              |                 |
| ORF27        |                                                              |                 | 67770        | 68567        | +         |              |                 |               |                 |              |                 |
| <b>ORF28</b> | <b>Membrane glycoprotein</b>                                 | <b>1.00E-76</b> | <b>68678</b> | <b>72244</b> | <b>+</b>  | <b>ORF46</b> | <b>4.00E-61</b> | <b>ORF99</b>  | <b>3.00E-06</b> | <b>ORF46</b> | <b>3.00E-08</b> |
| ORF29        |                                                              |                 | 72308        | 72745        | +         |              |                 |               |                 |              |                 |
| ORF30        |                                                              |                 | 73699        | 75159        | +         |              |                 |               |                 |              |                 |
| ORF31        |                                                              |                 | 75261        | 76163        | +         |              |                 |               |                 |              |                 |
| ORF32        |                                                              |                 | 76281        | 77024        | +         |              |                 |               |                 |              |                 |
| ORF33        |                                                              |                 | 77868        | 78446        | -         |              |                 |               |                 |              |                 |
| <b>ORF34</b> | <b>Major capsid protein</b>                                  | <b>2.00E-36</b> | <b>78524</b> | <b>81322</b> | <b>-</b>  | <b>ORF39</b> | <b>2.00E-36</b> | <b>ORF92R</b> | <b>0.013</b>    | <b>ORF54</b> | <b>2.00E-07</b> |
| ORF35        |                                                              |                 | 81282        | 81962        | -         |              |                 |               |                 |              |                 |
| ORF36        |                                                              |                 | 82046        | 82480        | -         |              |                 |               |                 |              |                 |
| <b>ORF37</b> | <b>ORF37</b>                                                 | <b>6.00E-07</b> | <b>82567</b> | <b>84762</b> | <b>+</b>  | <b>ORF37</b> | <b>4.00E-04</b> | <b>ORF90L</b> | <b>1.90E-01</b> | <b>ORF52</b> | <b>-</b>        |
| ORF38        |                                                              |                 | 84698        | 85987        | -         |              |                 |               |                 |              |                 |
| ORF39        |                                                              |                 | 86723        | 87553        | -         |              |                 |               |                 |              |                 |
| <b>ORF40</b> | <b>ORF34</b>                                                 | <b>2.00E-45</b> | <b>87634</b> | <b>89127</b> | <b>-</b>  | <b>ORF34</b> | <b>2.00E-36</b> |               |                 | <b>ORF49</b> | <b>2.00E-26</b> |
| ORF41        |                                                              |                 | 88886        | 89782        | -         |              |                 |               |                 |              |                 |
| ORF42        |                                                              |                 | 89745        | 90503        | +         |              |                 |               |                 |              |                 |
| ORF43        | EH28 (L. crocea)                                             | 2.00E-112       | 91199        | 93949        | -         |              |                 |               |                 |              |                 |
| <b>ORF44</b> | <b>ORF44</b>                                                 | <b>3.00E-20</b> | <b>94653</b> | <b>95249</b> | <b>+</b>  | <b>ORF44</b> | <b>5.00E-18</b> |               |                 | <b>ORF59</b> | <b>4.00E-08</b> |
| ORF45        |                                                              |                 | 95298        | 95900        | +         |              |                 |               |                 |              |                 |
| ORF46        |                                                              |                 | 96733        | 98349        | +         |              |                 |               |                 |              |                 |
| ORF47        | chromosome segregation ATPase domain                         |                 | 98647        | 100746       | +         |              |                 |               |                 |              |                 |
| ORF48        |                                                              |                 | 100966       | 101391       | -         |              |                 |               |                 |              |                 |
| ORF49        |                                                              |                 | 101552       | 102097       | +         |              |                 |               |                 |              |                 |
| ORF50        | mcl-1 (P. reticulata)                                        | 5.00E-19        | 102609       | 103540       | -         |              |                 |               |                 |              |                 |
| ORF51        |                                                              |                 | 104244       | 106058       | +         |              |                 |               |                 |              |                 |

**Supplementary Table 2 Continued**

| Gene  | properties or putative functions                            | Evalue          | start                 | end             | direction     | IcHV-1        |                 | CyHV-3         |                 | RaHV-1        |                 |
|-------|-------------------------------------------------------------|-----------------|-----------------------|-----------------|---------------|---------------|-----------------|----------------|-----------------|---------------|-----------------|
|       |                                                             |                 |                       |                 |               | ORF           | Evalue          | ORF            | Evalue          | ORF           | Evalue          |
| ORF52 |                                                             |                 | 107323                | 107808          | +             |               |                 |                |                 |               |                 |
| ORF53 |                                                             |                 | 108960                | 109283          | +             |               |                 |                |                 |               |                 |
| ORF54 | ORF73_protein-kinase (IcHV-1)                               | 2.00E-08        | 109630                | 113034          | -             | ORF73         | 2.00E-08        |                |                 |               |                 |
| ORF55 |                                                             |                 | 113074                | 113862          | +             |               |                 |                |                 |               |                 |
| ORF56 | OTU-like cysteine protease domain                           | 8.00E-30        | 114609                | 115940          | +             |               |                 |                |                 |               |                 |
| ORF57 |                                                             |                 | 115912                | 116328          | +             |               |                 |                |                 |               |                 |
| ORF58 |                                                             |                 | 118409                | 119536          | -             |               |                 |                |                 |               |                 |
| ORF59 |                                                             |                 | <b>DNA polymerase</b> | <b>1.00E-99</b> | <b>119679</b> | <b>124610</b> | -               | <b>ORF57</b>   | <b>1.00E-99</b> | <b>ORF79R</b> | <b>1.00E-53</b> |
| ORF60 | <b>ORF56</b>                                                | <b>2.00E-44</b> | <b>125229</b>         | <b>128513</b>   | +             | <b>ORF56</b>  | <b>8.00E-41</b> | <b>ORF107R</b> | <b>4.00E-18</b> | <b>ORF73</b>  | <b>3.00E-34</b> |
| ORF61 |                                                             |                 | 128443                | 129324          | +             |               |                 |                |                 |               |                 |
| ORF62 |                                                             |                 | 129467                | 129901          | +             |               |                 |                |                 |               |                 |
| ORF63 |                                                             |                 | 131394                | 131708          | -             |               |                 |                |                 |               |                 |
| ORF64 |                                                             |                 | 132035                | 132493          | +             |               |                 |                |                 |               |                 |
| ORF65 |                                                             |                 | 133238                | 134752          | -             |               |                 |                |                 |               |                 |
| ORF66 | tumor necrosis factor receptor 6B-like ( <i>L. crocea</i> ) | 5.00E-04        | 134749                | 138765          | -             |               |                 |                |                 |               |                 |
| ORF67 | DNA methyltransferase (Lymphocystic disease virus 1)        | 8.00E-08        | 138881                | 139774          | +             |               |                 |                |                 |               |                 |
| ORF68 | <b>primase</b>                                              | <b>8.00E-14</b> | <b>140358</b>         | <b>142682</b>   | -             | <b>ORF63</b>  | <b>1.00E-11</b> | <b>ORF46R</b>  | <b>7.00E-06</b> | <b>ORF87</b>  | <b>9.00E-07</b> |
| ORF69 |                                                             |                 | 142776                | 143324          | -             |               |                 |                |                 |               |                 |
| ORF70 | <b>DNA packaging terminase subunit 1</b>                    | <b>2.00E-41</b> | <b>143537</b>         | <b>144751</b>   | -             | <b>ORF62</b>  | <b>2.00E-41</b> | <b>ORF33L</b>  | <b>2.00E-27</b> | <b>ORF42</b>  | <b>3.00E-21</b> |
| ORF71 |                                                             |                 | 144621                | 145595          | +             |               |                 |                |                 |               |                 |
| ORF72 |                                                             |                 | 145737                | 146765          | +             |               |                 |                |                 |               |                 |
| ORF73 |                                                             |                 | 147230                | 147760          | +             |               |                 |                |                 |               |                 |
| ORF74 | <b>DNA packaging terminase subunit 1</b>                    | <b>1.00E-14</b> | <b>148139</b>         | <b>148972</b>   | -             | <b>ORF62</b>  | <b>1.00E-08</b> | <b>ORF33L</b>  | <b>3.00E-04</b> | <b>ORF42</b>  | -               |
| ORF75 | cbp_p300-interacting transactivator ( <i>L. crocea</i> )    | 5.00E-85        | 149197                | 150045          | +             |               |                 |                |                 |               |                 |
| ORF76 | <b>DNA packaging terminase subunit 1</b>                    | <b>4.00E-06</b> | <b>149968</b>         | <b>150306</b>   | -             | <b>ORF62</b>  | <b>4.00E-06</b> | <b>ORF33L</b>  | <b>0.066</b>    | <b>ORF42</b>  | <b>9.00E-05</b> |
| ORF77 |                                                             |                 | 150567                | 150866          | -             |               |                 |                |                 |               |                 |
| ORF78 | ORF70 (RaHV-2)                                              | 0.13            | 150869                | 151912          | +             |               |                 |                |                 |               |                 |
| ORF79 |                                                             |                 | 152462                | 152794          | -             |               |                 |                |                 |               |                 |
| ORF80 | <b>ORF64</b>                                                | <b>1.00E-14</b> | <b>152775</b>         | <b>154400</b>   | -             | <b>ORF64</b>  | <b>1.00E-14</b> | <b>ORF47</b>   | -               | <b>ORF88</b>  | -               |
| ORF81 |                                                             |                 | 154274                | 160384          | -             |               |                 |                |                 |               |                 |
| ORF82 |                                                             |                 | 160328                | 161767          | +             |               |                 |                |                 |               |                 |
| ORF83 |                                                             |                 | 161778                | 162113          | +             |               |                 |                |                 |               |                 |
| ORF84 |                                                             |                 | 162475                | 166134          | +             |               |                 |                |                 |               |                 |
| ORF85 | sorbitol dehydrogenase ( <i>M. saccharolyticus</i> )        | 0.007           | 166477                | 170865          | -             |               |                 |                |                 |               |                 |
| ORF86 |                                                             |                 | 171067                | 172581          | -             |               |                 |                |                 |               |                 |
| ORF87 | ORF78 (IcHV-1)                                              | 0.13            | 172628                | 174052          | +             | ORF78         | 0.13            |                |                 |               |                 |
| ORF88 | serine/threonine-protein kinase pim3 ( <i>S. salar</i> )    | 4.00E-77        | 174720                | 175745          | +             |               |                 |                |                 |               |                 |

**Supplementary Table 3 | Variants inside coding region of subtype 1 *Teratorn*.**

| #GeneName                 | frameshift | stop_gained | inframe_del | inframe_ins | nonsynonymous | synonymous |
|---------------------------|------------|-------------|-------------|-------------|---------------|------------|
| 1                         | 0          | 0           | 0           | 0           | 0             | 0          |
| 2-MyoD2                   | 0          | 0           | 0           | 0           | 17            | 8          |
| 3                         | 0          | 0           | 0           | 0           | 0             | 0          |
| 4                         | 0          | 0           | 0           | 0           | 0             | 0          |
| 5                         | 0          | 0           | 0           | 0           | 8             | 10         |
| 6-ORF60                   | 1          | 0           | 0           | 0           | 32            | 24         |
| 7-ORF54                   | 0          | 4           | 0           | 1           | 78            | 46         |
| 8-piggyBac                | 0          | 1           | 0           | 1           | 89            | 54         |
| 9                         | 0          | 0           | 0           | 0           | 8             | 7          |
| 10_ORF56                  | 0          | 1           | 0           | 0           | 119           | 126        |
| 11-DNApol                 | 0          | 1           | 0           | 0           | 72            | 96         |
| 12                        | 0          | 0           | 0           | 0           | 21            | 21         |
| 13-OTU                    | 0          | 1           | 0           | 0           | 26            | 19         |
| 14                        | 0          | 0           | 0           | 0           | 5             | 6          |
| 15                        | 0          | 0           | 0           | 0           | 15            | 11         |
| 16-ORF73_kinase           | 1          | 0           | 0           | 0           | 37            | 38         |
| 17                        | 0          | 0           | 0           | 0           | 16            | 20         |
| 18-CD276                  | 0          | 1           | 0           | 0           | 26            | 11         |
| 19-CD276                  | 0          | 2           | 0           | 0           | 29            | 11         |
| 20                        | 0          | 0           | 0           | 0           | 6             | 2          |
| 21-HERV-H_LTR-ass_pro_2   | 0          | 0           | 0           | 0           | 19            | 7          |
| 22                        | 0          | 0           | 0           | 0           | 54            | 32         |
| 23-Mcl                    | 0          | 0           | 0           | 0           | 10            | 3          |
| 24-CDK2                   | 0          | 0           | 0           | 0           | 11            | 9          |
| 25-ZFP36                  | 0          | 0           | 0           | 0           | 23            | 10         |
| 27                        | 0          | 1           | 0           | 0           | 8             | 5          |
| 28-CAP_Gly                | 0          | 0           | 0           | 0           | 49            | 22         |
| 29                        | 3          | 0           | 0           | 0           | 23            | 20         |
| 30                        | 0          | 0           | 0           | 0           | 6             | 8          |
| 31-ORF44                  | 0          | 0           | 0           | 0           | 28            | 14         |
| 32                        | 0          | 0           | 0           | 0           | 34            | 33         |
| 33                        | 0          | 0           | 0           | 0           | 11            | 12         |
| 34                        | 0          | 0           | 0           | 0           | 19            | 11         |
| 35-ORF34                  | 0          | 0           | 0           | 0           | 17            | 19         |
| 36                        | 1          | 1           | 0           | 0           | 15            | 12         |
| 37                        | 0          | 1           | 0           | 0           | 7             | 3          |
| 38-ORF37                  | 0          | 1           | 0           | 0           | 32            | 33         |
| 39                        | 0          | 0           | 0           | 0           | 14            | 5          |
| 40-MajorCapsid            | 0          | 1           | 0           | 0           | 43            | 62         |
| 41                        | 0          | 0           | 0           | 0           | 18            | 29         |
| 42-Diguanylate_cyclase    | 3          | 0           | 0           | 0           | 11            | 8          |
| 43                        | 0          | 0           | 0           | 0           | 33            | 25         |
| 44                        | 0          | 1           | 0           | 0           | 62            | 27         |
| 45-MemGly                 | 0          | 1           | 0           | 0           | 53            | 69         |
| 46                        | 0          | 0           | 0           | 0           | 10            | 15         |
| 47-myopalladin            | 0          | 0           | 0           | 0           | 9             | 6          |
| 48-CapMat                 | 0          | 0           | 0           | 0           | 33            | 30         |
| 49                        | 0          | 0           | 0           | 0           | 12            | 12         |
| 50                        | 0          | 0           | 0           | 0           | 14            | 10         |
| 51                        | 0          | 0           | 0           | 0           | 11            | 6          |
| 52                        | 0          | 0           | 0           | 0           | 1             | 4          |
| 53-Thiopurine_S_methylase | 0          | 0           | 0           | 0           | 6             | 2          |
| 54-ZF_BED_domain          | 3          | 3           | 0           | 0           | 23            | 11         |
| 55-triplex                | 0          | 1           | 0           | 0           | 3             | 4          |
| 57                        | 0          | 0           | 0           | 0           | 12            | 8          |
| 58-DNAhel                 | 0          | 1           | 0           | 0           | 13            | 21         |
| 59                        | 0          | 0           | 0           | 0           | 21            | 12         |
| 60-permease_YjgP/YjgQ     | 0          | 1           | 0           | 0           | 16            | 14         |
| 61-ZF_SCA                 | 0          | 1           | 0           | 0           | 25            | 5          |
| 62-CXCR                   | 0          | 0           | 0           | 0           | 18            | 6          |
| 63                        | 0          | 0           | 0           | 0           | 23            | 14         |
| 64-TARBP                  | 0          | 2           | 0           | 0           | 7             | 7          |
| 65                        | 0          | 0           | 0           | 0           | 15            | 5          |
| 66                        | 0          | 0           | 0           | 0           | 11            | 6          |

**Supplementary Table 3 Continued**

| #GeneName           | frameshift | stop_gained | inframe_del | inframe_ins | nonsynonymous | synonymous  |
|---------------------|------------|-------------|-------------|-------------|---------------|-------------|
| 67-ORF57R           | 0          | 0           | 0           | 0           | 14            | 13          |
| 68                  | 0          | 0           | 0           | 0           | 4             | 2           |
| 69                  | 0          | 0           | 0           | 0           | 31            | 23          |
| 70                  | 2          | 3           | 0           | 0           | 73            | 26          |
| 71-methyltransferas | 0          | 0           | 0           | 0           | 14            | 10          |
| 72-Primase          | 0          | 2           | 1           | 0           | 22            | 32          |
| 73                  | 0          | 1           | 0           | 0           | 11            | 6           |
| 74-terminase        | 0          | 0           | 0           | 0           | 15            | 13          |
| 75                  | 0          | 0           | 0           | 0           | 17            | 14          |
| 76                  | 0          | 0           | 0           | 0           | 11            | 7           |
| 77                  | 0          | 0           | 0           | 0           | 13            | 7           |
| 78-terminase        | 0          | 0           | 0           | 0           | 12            | 6           |
| 79-Cbp_p300         | 0          | 0           | 0           | 0           | 27            | 17          |
| 80-ORF70            | 0          | 0           | 0           | 0           | 23            | 28          |
| 81                  | 0          | 0           | 0           | 0           | 4             | 3           |
| 82-ORF64            | 0          | 0           | 0           | 0           | 24            | 22          |
| 83                  | 0          | 3           | 0           | 0           | 175           | 171         |
| 84                  | 2          | 1           | 0           | 0           | 48            | 58          |
| 85                  | 0          | 0           | 0           | 0           | 83            | 74          |
| 86                  | 0          | 4           | 0           | 0           | 67            | 51          |
| 87                  | 0          | 0           | 0           | 0           | 21            | 16          |
| 88                  | 0          | 0           | 0           | 0           | 9             | 6           |
| 89-pim3             | 0          | 1           | 0           | 0           | 40            | 27          |
| 90-CLIC             | 0          | 0           | 0           | 0           | 6             | 4           |
| <b>TOTAL</b>        | <b>16</b>  | <b>42</b>   | <b>1</b>    | <b>2</b>    | <b>2251</b>   | <b>1822</b> |

Variant frequency

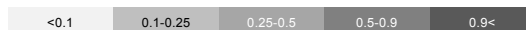



**Supplementary Table 4 | Variants inside coding region of subtype 2 *Teratorn*.**

| #GeneName       | frameshift | stop_gained | inframe_del | inframe_ins | nonsynonymous | synonymous |
|-----------------|------------|-------------|-------------|-------------|---------------|------------|
| 1L-HAFrepeat    | 0          | 0           | 0           | 0           | 1             | 0          |
| 2L-SIPA1        | 1          | 0           | 0           | 0           | 20            | 5          |
| 3L              | 1          | 1           | 0           | 0           | 13            | 3          |
| 4L              | 0          | 0           | 0           | 0           | 0             | 0          |
| 5L              | 1          | 0           | 0           | 0           | 0             | 2          |
| 6L-RdDp-jockey  | 3          | 1           | 0           | 0           | 13            | 9          |
| 7-RdDp-jockey   | 2          | 3           | 1           | 0           | 46            | 22         |
| 6R-RdDp-jockey- | 1          | 0           | 0           | 0           | 3             | 3          |
| 5R              | 1          | 1           | 0           | 0           | 20            | 7          |
| 4R              | 1          | 3           | 0           | 0           | 16            | 10         |
| 3R              | 0          | 0           | 0           | 0           | 0             | 0          |
| 2R-SIPA1        | 0          | 0           | 0           | 0           | 8             | 0          |
| 1R-HAFrepeat    | 0          | 0           | 0           | 0           | 0             | 0          |
| 8               | 0          | 0           | 0           | 0           | 1             | 2          |
| 9-ORF60         | 0          | 0           | 0           | 0           | 6             | 9          |
| 10-ORF54        | 0          | 0           | 0           | 0           | 15            | 7          |
| 11-piggyBac     | 0          | 1           | 0           | 0           | 114           | 68         |
| 12-MyoD         | 0          | 0           | 0           | 0           | 41            | 17         |
| 13              | 4          | 1           | 0           | 0           | 8             | 4          |
| 14              | 0          | 0           | 0           | 0           | 5             | 2          |
| 15-DNAhel       | 0          | 1           | 0           | 0           | 3             | 7          |
| 16              | 0          | 0           | 0           | 0           | 1             | 1          |
| 17-triplex      | 0          | 0           | 0           | 0           | 3             | 6          |
| 18              | 3          | 0           | 0           | 0           | 2             | 2          |
| 19-ZF_BED       | 0          | 0           | 0           | 0           | 4             | 1          |
| 20              | 0          | 0           | 0           | 0           | 12            | 1          |
| 21              | 0          | 0           | 0           | 0           | 2             | 4          |
| 22              | 0          | 0           | 0           | 0           | 8             | 2          |
| 23              | 0          | 0           | 0           | 0           | 6             | 2          |
| 24              | 0          | 0           | 0           | 0           | 4             | 3          |
| 25-CapMat       | 0          | 0           | 1           | 0           | 7             | 6          |
| 26-myopalladin  | 0          | 0           | 0           | 0           | 5             | 2          |
| 27              | 0          | 0           | 0           | 0           | 3             | 2          |
| 28-MemGly       | 0          | 0           | 0           | 0           | 8             | 10         |
| 29              | 0          | 0           | 0           | 0           | 1             | 0          |
| 30              | 0          | 0           | 1           | 0           | 8             | 6          |
| 31              | 0          | 0           | 0           | 0           | 11            | 17         |
| 32              | 0          | 0           | 0           | 0           | 8             | 6          |
| 33              | 0          | 0           | 0           | 0           | 6             | 18         |
| 34-MajorCapsid  | 0          | 0           | 0           | 0           | 4             | 11         |
| 35              | 1          | 0           | 0           | 0           | 0             | 2          |
| 36              | 0          | 0           | 0           | 0           | 3             | 1          |
| 37-ORF37        | 1          | 0           | 0           | 0           | 4             | 10         |
| 38              | 1          | 0           | 0           | 0           | 10            | 5          |
| 39              | 0          | 0           | 0           | 0           | 2             | 5          |
| 40-ORF34        | 0          | 0           | 0           | 0           | 8             | 3          |
| 41              | 0          | 0           | 0           | 0           | 7             | 1          |
| 42              | 0          | 0           | 0           | 0           | 5             | 3          |
| 43-EH28         | 0          | 2           | 0           | 0           | 10            | 17         |
| 44-ORF44        | 0          | 0           | 0           | 0           | 9             | 10         |
| 45              | 2          | 1           | 0           | 0           | 24            | 11         |
| 46              | 0          | 0           | 0           | 0           | 25            | 26         |
| 47-CAP_Gly      | 0          | 1           | 0           | 0           | 82            | 33         |
| 48              | 4          | 0           | 0           | 1           | 4             | 2          |
| 49              | 0          | 0           | 0           | 0           | 18            | 9          |
| 50              | 0          | 0           | 0           | 0           | 3             | 3          |
| 51              | 2          | 0           | 1           | 0           | 52            | 61         |
| 52              | 0          | 0           | 0           | 0           | 35            | 16         |
| 53              | 0          | 0           | 0           | 0           | 2             | 0          |
| 54-ORF73_kinase | 0          | 1           | 0           | 0           | 22            | 16         |
| 55              | 0          | 0           | 0           | 0           | 5             | 4          |
| 56-OTU          | 1          | 0           | 0           | 1           | 8             | 4          |
| 57              | 0          | 0           | 0           | 0           | 1             | 1          |

**Supplementary Table 4 Continued**

| #GeneName                 | frameshift | stop_gained | inframe_del | inframe_ins | nonsynonymous | synonymous |
|---------------------------|------------|-------------|-------------|-------------|---------------|------------|
| 58                        | 0          | 1           | 0           | 0           | 2             | 4          |
| 59-DNApol                 | 0          | 0           | 0           | 0           | 14            | 11         |
| 60-ORF56                  | 1          | 0           | 0           | 0           | 54            | 59         |
| 61                        | 0          | 0           | 0           | 0           | 5             | 3          |
| 62                        | 0          | 0           | 0           | 0           | 3             | 1          |
| 63                        | 0          | 0           | 0           | 0           | 0             | 1          |
| 64                        | 0          | 0           | 0           | 0           | 2             | 2          |
| 65                        | 0          | 0           | 0           | 0           | 7             | 9          |
| 66-TNFR                   | 0          | 0           | 0           | 0           | 20            | 10         |
| 67-DNA_methyltransferase  | 0          | 0           | 0           | 0           | 4             | 3          |
| 68-primase                | 0          | 0           | 0           | 0           | 11            | 9          |
| 69                        | 0          | 0           | 0           | 0           | 2             | 0          |
| 70-terminase1             | 0          | 0           | 0           | 0           | 1             | 3          |
| 71                        | 0          | 0           | 0           | 0           | 3             | 7          |
| 72                        | 0          | 0           | 0           | 0           | 4             | 2          |
| 73                        | 0          | 0           | 0           | 0           | 4             | 2          |
| 74-terminase2             | 0          | 0           | 0           | 0           | 3             | 0          |
| 75-Cbp_p300               | 0          | 0           | 0           | 0           | 13            | 4          |
| 76-terminase3             | 0          | 0           | 0           | 0           | 15            | 26         |
| 77                        | 3          | 0           | 0           | 0           | 5             | 2          |
| 78-ORF70                  | 0          | 0           | 0           | 0           | 6             | 3          |
| 79                        | 0          | 0           | 0           | 0           | 1             | 0          |
| 80-ORF64                  | 0          | 0           | 0           | 0           | 11            | 4          |
| 81                        | 0          | 2           | 0           | 0           | 62            | 33         |
| 82                        | 0          | 0           | 0           | 0           | 8             | 3          |
| 83                        | 1          | 0           | 0           | 0           | 4             | 3          |
| 84                        | 0          | 0           | 0           | 1           | 26            | 15         |
| 85-Sorbitol_dehydrogenase | 0          | 1           | 0           | 1           | 29            | 17         |
| 86                        | 0          | 1           | 0           | 0           | 4             | 9          |
| 87-ORF78                  | 0          | 0           | 0           | 0           | 4             | 4          |
| 88-pim                    | 1          | 1           | 0           | 0           | 23            | 25         |
| <b>TOTAL</b>              | <b>36</b>  | <b>23</b>   | <b>4</b>    | <b>4</b>    | <b>1125</b>   | <b>794</b> |

Variant frequency

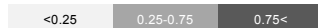

**Supplementary Table 5 | Predicted ORFs inside *Teratorn* of *Oryzias dancena*.**

| Gene         | properties or putative functions                          | Evalue           | start         | end           | direction |
|--------------|-----------------------------------------------------------|------------------|---------------|---------------|-----------|
| ORF1         |                                                           |                  | 1             | 507           | -         |
| <b>ORF2</b>  | <b>ORF60</b>                                              | <b>1.00E-22</b>  | <b>665</b>    | <b>1948</b>   | <b>+</b>  |
| <b>ORF3</b>  | <b>ORF54</b>                                              | <b>9.00E-05</b>  | <b>1939</b>   | <b>3930</b>   | <b>+</b>  |
| <b>ORF4</b>  | <b>piggyBac-like transposase</b>                          | <b>0</b>         | <b>4160</b>   | <b>5842</b>   | <b>+</b>  |
| ORF6         |                                                           |                  | 7318          | 8655          | +         |
| <b>ORF7</b>  | <b>DNA helicase (UL9 homolog)</b>                         | <b>2.00E-47</b>  | <b>8708</b>   | <b>10477</b>  | <b>+</b>  |
| ORF8         |                                                           |                  | 10558         | 10968         | +         |
| <b>ORF9</b>  | <b>Capsid triplex protein subunit 2</b>                   | <b>6.00E-06</b>  | <b>10994</b>  | <b>11863</b>  | <b>+</b>  |
| ORF10        | Zinc finger and BED domain-containing protein (L. crocea) | 2.00E-20         | 12450         | 13172         | -         |
| ORF11        |                                                           |                  | 13645         | 14076         | -         |
| ORF12        |                                                           |                  | 14291         | 14818         | -         |
| ORF13        |                                                           |                  | 14834         | 15424         | -         |
| ORF14        |                                                           |                  | 15572         | 16645         | -         |
| <b>ORF15</b> | <b>Capsid maturation protease</b>                         | <b>2.00E-11</b>  | <b>16983</b>  | <b>19100</b>  | <b>-</b>  |
| ORF16        | myopalladin, partial (O. latipes)                         | 4.00E-09         | 19156         | 19737         | -         |
| ORF17        |                                                           |                  | 19935         | 20546         | +         |
| <b>ORF18</b> | <b>Membrane protein</b>                                   | <b>3.00E-93</b>  | <b>20679</b>  | <b>24785</b>  | <b>+</b>  |
| ORF19        |                                                           |                  | 25822         | 27534         | +         |
| ORF20        |                                                           |                  | 27650         | 29329         | +         |
| ORF21        |                                                           |                  | 29939         | 30520         | -         |
| <b>ORF22</b> | <b>Major capsid protein</b>                               | <b>9.00E-22</b>  | <b>30601</b>  | <b>34053</b>  | <b>-</b>  |
| ORF23        |                                                           |                  | 34174         | 34608         | -         |
| <b>ORF24</b> | <b>ORF37</b>                                              | <b>3.00E-08</b>  | <b>34720</b>  | <b>36969</b>  | <b>+</b>  |
| ORF25        |                                                           |                  | 36834         | 38210         | -         |
| ORF26        |                                                           |                  | 38273         | 39121         | -         |
| <b>ORF27</b> | <b>ORF34</b>                                              | <b>7.00E-19</b>  | <b>39142</b>  | <b>39891</b>  | <b>-</b>  |
| ORF28        |                                                           |                  | 40409         | 41359         | -         |
| ORF29        |                                                           |                  | 41358         | 42083         | +         |
| ORF30        |                                                           |                  | 42258         | 45059         | -         |
| <b>ORF31</b> | <b>ORF44</b>                                              | <b>5.00E-18</b>  | <b>45117</b>  | <b>46388</b>  | <b>+</b>  |
| ORF32        |                                                           |                  | 46433         | 47182         | +         |
| ORF33        |                                                           |                  | 47550         | 49193         | +         |
| ORF34        |                                                           |                  | 49225         | 51618         | +         |
| ORF35        |                                                           |                  | 51751         | 52281         | +         |
| ORF36        | CDK2 (L. crocea)                                          | 1.00E-78         | 54322         | 55209         | -         |
| ORF37        | Mcl1b                                                     | 1.00E-10         | 55637         | 55945         | -         |
| ORF38        |                                                           |                  | 56874         | 60578         | +         |
| ORF39        | CD276 antigen-like (H. burtoni)                           | 1.00E-10         | 61870         | 62352         | -         |
| ORF40        |                                                           |                  | 66100         | 66561         | -         |
| ORF41        | ubl carboxyl-terminal hydrolase (H. burtoni)              | 1.00E-28         | 68106         | 69020         | -         |
| <b>ORF42</b> | <b>ser/thr protein kinase (. brichardi)</b>               | <b>2.00E-27</b>  | <b>69028</b>  | <b>72474</b>  | <b>-</b>  |
| ORF43        |                                                           |                  | 72516         | 73295         | +         |
| ORF44        |                                                           |                  | 73888         | 74290         | -         |
| ORF45        | OTU-like cysteine protease (C. semilaevis)                | 5.00E-31         | 74701         | 76350         | +         |
| ORF46        |                                                           |                  | 76607         | 77740         | -         |
| <b>ORF47</b> | <b>DNA polymerase</b>                                     | <b>2.00E-106</b> | <b>77912</b>  | <b>82873</b>  | <b>-</b>  |
| ORF48        |                                                           |                  | 83088         | 83444         | -         |
| <b>ORF49</b> | <b>ORF56</b>                                              | <b>3.00E-43</b>  | <b>83537</b>  | <b>87553</b>  | <b>+</b>  |
| ORF50        | type2-angiotensin 2 receptor-like, CXCR (O. latipes)      | 2.00E-59         | 88092         | 88568         | -         |
| ORF51        | type2-angiotensin 2 receptor-like, CXCR (O. latipes)      | 1.00E-36         | 88794         | 89168         | -         |
| ORF52        |                                                           |                  | 89802         | 90884         | +         |
| ORF53        |                                                           |                  | 91051         | 91515         | +         |
| ORF54        |                                                           |                  | 92819         | 93157         | +         |
| ORF55        |                                                           |                  | 94291         | 94644         | -         |
| ORF56        |                                                           |                  | 95202         | 95510         | +         |
| ORF57        |                                                           |                  | 96000         | 96689         | -         |
| <b>ORF58</b> | <b>ORF57R (CyHV-3)</b>                                    | <b>4.00E-11</b>  | <b>97271</b>  | <b>98464</b>  | <b>-</b>  |
| ORF59        |                                                           |                  | 98607         | 99362         | -         |
| ORF60        |                                                           |                  | 99955         | 100764        | -         |
| ORF61        |                                                           |                  | 101366        | 102157        | -         |
| ORF62        |                                                           |                  | 102818        | 104377        | -         |
| ORF63        | osteoprotegerin a precursor, TNFR-like (O. latipes)       | 1.00E-04         | 104374        | 108162        | -         |
| ORF64        | DNA methyltransferase (Lymphocystis disease virus 1)      |                  | 108365        | 109132        | +         |
| <b>ORF65</b> | <b>primase</b>                                            | <b>7.00E-24</b>  | <b>109786</b> | <b>112152</b> | <b>-</b>  |

## Supplementary Table 5 Continued

| Gene         | properties or putative functions                 | Evalue          | start         | end           | direction |
|--------------|--------------------------------------------------|-----------------|---------------|---------------|-----------|
| <b>ORF66</b> | <b>DNA packaging terminase subunit 1</b>         | <b>4.00E-38</b> | <b>112377</b> | <b>114260</b> | <b>-</b>  |
| ORF67        |                                                  |                 | 114238        | 115113        | +         |
| ORF68        |                                                  |                 | 115247        | 116407        | +         |
| ORF69        |                                                  |                 | 116729        | 117256        | +         |
| <b>ORF70</b> | <b>DNA packaging terminase subunit 1</b>         | <b>4.00E-11</b> | <b>117660</b> | <b>118493</b> | <b>-</b>  |
| ORF71        | Cbp-p300_interacting_transactivator1 (L. crocea) | 3.00E-87        | 118689        | 119531        | +         |
| ORF72        |                                                  |                 | 120359        | 121570        | +         |
| ORF73        |                                                  |                 | 121951        | 122274        | -         |
| <b>ORF74</b> | <b>ORF64</b>                                     | <b>2.00E-14</b> | <b>122255</b> | <b>123754</b> | <b>-</b>  |
| ORF75        |                                                  |                 | 123751        | 129732        | -         |
| ORF76        |                                                  |                 | 129802        | 131241        | +         |
| ORF77        |                                                  |                 | 131312        | 135631        | +         |
| ORF78        |                                                  |                 | 136123        | 140157        | -         |

**Supplementary Table 6 | Predicted ORFs inside *Teratorn*-like element of yellow croaker (*Larimichthys crocea*).**

| Gene         | Annotation                                              | Evalue          | start         | end           | direction |
|--------------|---------------------------------------------------------|-----------------|---------------|---------------|-----------|
| ORF1         |                                                         |                 | 121           | 609           | +         |
| ORF2         |                                                         |                 | 1734          | 2060          | +         |
| ORF3         |                                                         |                 | 2286          | 2888          | +         |
| ORF4         | ORF72R (infectious spleen and kidney necrosis virus)    | 2.00E-36        | 3572          | 3961          | -         |
| ORF5         | ORF72R (infectious spleen and kidney necrosis virus)    | 2.00E-38        | 3989          | 4390          | -         |
| ORF6         |                                                         |                 | 5426          | 5794          | -         |
| ORF7         |                                                         |                 | 6125          | 6427          | -         |
| ORF8         | phosphatase_regulatory_subunit_15B (Xenopus tropicalis) | 6.00E-07        | 6671          | 7006          | -         |
| ORF9         |                                                         |                 | 7332          | 8096          | -         |
| <b>ORF10</b> | <b>ORF60</b>                                            | <b>4.00E-25</b> | <b>8603</b>   | <b>9508</b>   | <b>+</b>  |
| <b>ORF11</b> | <b>ORF54</b>                                            | <b>6.00E-04</b> | <b>9671</b>   | <b>11671</b>  | <b>+</b>  |
| <b>ORF12</b> | <b>ORF64</b>                                            | <b>6.00E-14</b> | <b>12416</b>  | <b>14077</b>  | <b>-</b>  |
| ORF13        |                                                         |                 | 14080         | 14748         | -         |
| ORF14        |                                                         |                 | 14790         | 20546         | -         |
| ORF15        |                                                         |                 | 20754         | 22091         | +         |
| ORF16        |                                                         |                 | 22260         | 26363         | -         |
| ORF17        |                                                         |                 | 26833         | 31038         | -         |
| ORF18        |                                                         |                 | 31280         | 32782         | -         |
| ORF19        |                                                         |                 | 32781         | 34226         | +         |
| ORF20        |                                                         |                 | 34990         | 37461         | +         |
| ORF21        |                                                         |                 | 38048         | 38437         | +         |
| ORF22        |                                                         |                 | 38566         | 39261         | +         |
| ORF23        |                                                         |                 | 39454         | 39861         | +         |
| ORF24        |                                                         |                 | 40287         | 40850         | -         |
| <b>ORF25</b> | <b>Major capsid protein</b>                             | <b>1.00E-49</b> | <b>40967</b>  | <b>44395</b>  | <b>-</b>  |
| ORF26        |                                                         |                 | 44558         | 44947         | -         |
| ORF27        |                                                         |                 | 45119         | 46072         | +         |
| <b>ORF28</b> | <b>ORF37</b>                                            | <b>5.00E-10</b> | <b>46072</b>  | <b>47391</b>  | <b>+</b>  |
| ORF29        |                                                         |                 | 47950         | 49269         | -         |
| ORF30        |                                                         |                 | 49303         | 50166         | -         |
| <b>ORF31</b> | <b>ORF34</b>                                            | <b>9.00E-43</b> | <b>50258</b>  | <b>51724</b>  | <b>-</b>  |
| ORF32        |                                                         |                 | 51567         | 52565         | -         |
| ORF33        |                                                         |                 | 52864         | 53310         | +         |
| ORF34        |                                                         |                 | 53622         | 55967         | -         |
| <b>ORF35</b> | <b>ORF44</b>                                            | <b>2.00E-16</b> | <b>56181</b>  | <b>57728</b>  | <b>+</b>  |
| ORF36        |                                                         |                 | 57837         | 58565         | +         |
| ORF37        |                                                         |                 | 58757         | 60127         | +         |
| ORF38        | GRIP_and_coiled_coil (N. brichardi)                     | 4.00E-18        | 60124         | 63150         | +         |
| ORF39        |                                                         |                 | 64474         | 65001         | -         |
| ORF40        |                                                         |                 | 65112         | 65762         | -         |
| ORF41        | Thioredoxin domain-containing protein 16 (L. crocea)    | 7.00E-40        | 66275         | 66724         | +         |
| ORF42        | E3_ubiquitin_ligase_makorin_like (S. partitus)          | 1.00E-24        | 67498         | 67824         | -         |
| ORF43        |                                                         |                 | 68413         | 69207         | -         |
| ORF44        |                                                         |                 | 69284         | 69937         | +         |
| <b>ORF45</b> | <b>ORF74_protein_kinase (lCHV-1)</b>                    | <b>3.00E-08</b> | <b>69822</b>  | <b>72800</b>  | <b>+</b>  |
| ORF46        |                                                         |                 | 74045         | 77260         | -         |
| ORF47        |                                                         |                 | 77354         | 77656         | -         |
| ORF48        | ribonuclease3 (Firmicutes bacterium)                    | 5.00E-06        | 79033         | 79557         | -         |
| ORF49        |                                                         |                 | 80066         | 80425         | +         |
| ORF50        |                                                         |                 | 80467         | 80859         | +         |
| ORF51        |                                                         |                 | 82345         | 83298         | -         |
| ORF52        | CDK2-like (O. latipes)                                  | 3.00E-79        | 83720         | 84652         | +         |
| ORF53        |                                                         |                 | 85901         | 86272         | +         |
| ORF54        |                                                         |                 | 86450         | 87295         | +         |
| <b>ORF55</b> | <b>DNA helicase (UL9 homolog)</b>                       | <b>1.00E-32</b> | <b>87369</b>  | <b>89156</b>  | <b>+</b>  |
| ORF56        |                                                         |                 | 89556         | 89942         | +         |
| <b>ORF57</b> | <b>Membrane protein</b>                                 | <b>9.00E-89</b> | <b>90410</b>  | <b>94528</b>  | <b>-</b>  |
| ORF58        |                                                         |                 | 94667         | 95584         | -         |
| ORF59        |                                                         |                 | 95527         | 96105         | +         |
| <b>ORF60</b> | <b>Capsid maturation protease</b>                       | <b>4.00E-12</b> | <b>96219</b>  | <b>98195</b>  | <b>+</b>  |
| ORF61        |                                                         |                 | 98503         | 99570         | +         |
| ORF62        |                                                         |                 | 99630         | 100226        | +         |
| ORF63        |                                                         |                 | 101040        | 101606        | +         |
| <b>ORF64</b> | <b>Capsid triplex protein subunit 2</b>                 | <b>1.00E-05</b> | <b>102451</b> | <b>103074</b> | <b>-</b>  |

**Supplementary Table 6 Continued**

| Gene         | properties or putative functions                            | Evalue           | start         | end           | direction |
|--------------|-------------------------------------------------------------|------------------|---------------|---------------|-----------|
| ORF65        |                                                             |                  | 103170        | 103604        | -         |
| ORF66        |                                                             |                  | 103966        | 108681        | -         |
| ORF67        |                                                             |                  | 109352        | 109795        | +         |
| ORF68        | ORF74 (Infectious spleen and kidney necrosis virus)         | 8.00E-15         | 110131        | 111033        | +         |
| ORF69        |                                                             |                  | 112595        | 113608        | -         |
| <b>ORF70</b> | <b>ORF35_AngHV</b>                                          | <b>4.00E-13</b>  | <b>113973</b> | <b>114986</b> | <b>-</b>  |
| ORF71        | extensin1-like (C. carolinensis)                            | 7.00E-05         | 115106        | 116218        | -         |
| ORF72        |                                                             |                  | 116853        | 118598        | -         |
| ORF73        |                                                             |                  | 118579        | 120915        | -         |
| ORF74        | TNFR_superfamily_6B-like (E. lucius)                        | 0.032            | 121306        | 122730        | -         |
| ORF75        | Cytosine_methyltransferase (Turbot reddish body iridovirus) | 1.00E-07         | 122796        | 123674        | +         |
| <b>ORF76</b> | <b>Primase</b>                                              | <b>3.00E-18</b>  | <b>123869</b> | <b>126163</b> | <b>-</b>  |
| <b>ORF77</b> | <b>DNA packaging terminase subunit 1</b>                    | <b>3.00E-39</b>  | <b>126482</b> | <b>127624</b> | <b>-</b>  |
| ORF78        |                                                             |                  | 127623        | 128456        | +         |
| ORF79        | FK506_binding_protein (O. niloticus)                        | 7.00E-05         | 129332        | 129679        | +         |
| ORF80        | type4_pilus_biogenesis_protein                              |                  | 129810        | 130286        | +         |
| ORF81        | Pyrin_domain_containing_protein1 (O. hannah)                | 0.017            | 131318        | 131866        | -         |
| <b>ORF82</b> | <b>DNA packaging terminase subunit 1</b>                    | <b>5.00E-11</b>  | <b>132348</b> | <b>133175</b> | <b>-</b>  |
| ORF83        | Cbp-p300_interacting_transactivator1 (L. crocea)            | 0                | 133266        | 134069        | +         |
| <b>ORF84</b> | <b>DNA packaging terminase subunit 1</b>                    | <b>7.00E-06</b>  | <b>134031</b> | <b>134330</b> | <b>-</b>  |
| ORF85        |                                                             |                  | 134929        | 136161        | +         |
| <b>ORF86</b> | <b>ORF56</b>                                                | <b>1.00E-42</b>  | <b>136608</b> | <b>140609</b> | <b>-</b>  |
| ORF87        | Cas5-like (S. archaeon)                                     | 0.059            | 141087        | 141386        | -         |
| <b>ORF88</b> | <b>DNA polymerase</b>                                       | <b>5.00E-99</b>  | <b>141593</b> | <b>146752</b> | <b>+</b>  |
| ORF89        |                                                             |                  | 146806        | 147969        | +         |
| ORF90        | OTU-like cysteine protease (O. niloticus)                   | 4.00E-48         | 149441        | 151249        | -         |
| ORF91        |                                                             |                  | 151552        | 152010        | +         |
| <b>ORF92</b> | <b>piggyBac-like transposase</b>                            | <b>5.00E-106</b> | <b>152426</b> | <b>156105</b> | <b>-</b>  |
| ORF93        |                                                             |                  | 156110        | 156412        | -         |

**Supplementary Table 7 | Predicted ORFs inside *Teratorn*-like element of Nile tilapia (*Oreochromis niloticus*).**

| Gene         | Annotation                                                             | Evalue          | start        | end          | direction |
|--------------|------------------------------------------------------------------------|-----------------|--------------|--------------|-----------|
| <b>ORF1</b>  | <b><i>pglgyBac</i></b>                                                 | <b>0</b>        | <b>394</b>   | <b>3354</b>  | <b>-</b>  |
| ORF2         |                                                                        |                 | 4171         | 4965         | -         |
| ORF3         |                                                                        |                 | 5158         | 5625         | -         |
| ORF4         |                                                                        |                 | 6343         | 7086         | +         |
| ORF5         | MHC class I antigen ( <i>O. niloticus</i> )                            | 0               | 7730         | 8842         | +         |
| <b>ORF6</b>  | <b>ORF147B (CyHV-1)</b>                                                | <b>8.00E-13</b> | <b>9439</b>  | <b>10497</b> | <b>-</b>  |
| <b>ORF7</b>  | <b>ORF147A, TNFR-like (CyHV-1)</b>                                     | <b>2.00E-09</b> | <b>10880</b> | <b>12295</b> | <b>+</b>  |
| <b>ORF8</b>  | <b>ORF147A, TNFR-like (CyHV-1)</b>                                     | <b>5.00E-48</b> | <b>12283</b> | <b>12996</b> | <b>+</b>  |
| ORF9         | butyrophilin-like ( <i>O. niloticus</i> )                              | 3.00E-29        | 13639        | 14250        | -         |
| ORF10        |                                                                        |                 | 14371        | 15051        | +         |
| ORF11        | MHC class I antigen, KD alpha chain-like ( <i>N. brichardi</i> )       | 6.00E-04        | 15348        | 15686        | -         |
| ORF12        |                                                                        |                 | 15806        | 16108        | -         |
| ORF13        | LPXTG-motif cell wall anchor domain ( <i>L. gasseri</i> )              | 2.00E-12        | 16509        | 16988        | -         |
| ORF14        | MHC class I antigen, KD alpha chain-like ( <i>N. brichardi</i> )       | 2.00E-55        | 17056        | 17766        | +         |
| ORF15        |                                                                        |                 | 18270        | 18584        | +         |
| ORF16        | MHC class I antigen, KD alpha chain-like ( <i>N. brichardi</i> )       | 7.00E-39        | 18672        | 18998        | +         |
| ORF17        | coxsackievirus and adenovirus receptor homolog ( <i>N. brichardi</i> ) | 1.00E-10        | 19033        | 19533        | -         |
| ORF18        |                                                                        |                 | 20201        | 20563        | +         |
| ORF19        | MHC class I antigen, KD alpha chain-like ( <i>N. brichardi</i> )       | 1.00E-45        | 20596        | 20946        | +         |
| ORF20        | coxsackievirus and adenovirus receptor homolog ( <i>N. brichardi</i> ) | 3.00E-34        | 21105        | 21671        | -         |
| ORF21        |                                                                        |                 | 22247        | 22759        | +         |
| ORF22        |                                                                        |                 | 22966        | 23529        | +         |
| ORF23        | E3 ubiquitin ligase TRIM31                                             | 2.00E-04        | 23562        | 23879        | +         |
| ORF24        |                                                                        |                 | 24004        | 24711        | -         |
| ORF25        | GRIP and coiled-coil domain ( <i>N. brichardi</i> )                    | 0               | 24720        | 26150        | -         |
| ORF26        |                                                                        |                 | 26215        | 27951        | -         |
| ORF27        |                                                                        |                 | 28174        | 28971        | -         |
| <b>ORF28</b> | <b>ORF44</b>                                                           | <b>6.00E-17</b> | <b>28987</b> | <b>30375</b> | <b>-</b>  |
| ORF29        |                                                                        |                 | 30229        | 32337        | +         |
| ORF30        |                                                                        |                 | 32275        | 33171        | -         |
| ORF31        |                                                                        |                 | 33418        | 33771        | +         |
| ORF32        | interleukin-2 receptor subunit beta ( <i>M. zebra</i> )                | 4.00E-06        | 33775        | 34551        | +         |
| <b>ORF33</b> | <b>DNA polymerase (IcHV-1)</b>                                         | <b>5.00E-38</b> | <b>34877</b> | <b>36763</b> | <b>+</b>  |
| <b>ORF34</b> | <b>DNA polymerase</b>                                                  | <b>8.00E-13</b> | <b>36751</b> | <b>37323</b> | <b>+</b>  |
| ORF35        |                                                                        |                 | 37423        | 37866        | +         |
| <b>ORF36</b> | <b>DNA polymerase</b>                                                  | <b>3.00E-05</b> | <b>37944</b> | <b>38276</b> | <b>+</b>  |
| <b>ORF37</b> | <b>DNA polymerase</b>                                                  | <b>2.00E-04</b> | <b>38303</b> | <b>39007</b> | <b>+</b>  |
| ORF38        |                                                                        |                 | 39037        | 39765        | +         |
| ORF39        |                                                                        |                 | 39936        | 41135        | +         |
| ORF40        | OTU-like cysteine protease ( <i>O. niloticus</i> )                     | 4.00E-27        | 41325        | 42992        | -         |
| ORF41        |                                                                        |                 | 43506        | 43901        | -         |
| <b>ORF42</b> | <b>Capsid maturation protease</b>                                      | <b>2.00E-05</b> | <b>44502</b> | <b>45152</b> | <b>-</b>  |
| ORF43        |                                                                        |                 | 45193        | 45750        | -         |
| ORF44        |                                                                        |                 | 45939        | 46529        | +         |
| <b>ORF45</b> | <b>Membrane glycoprotein</b>                                           | <b>2.00E-98</b> | <b>46598</b> | <b>50215</b> | <b>+</b>  |
| ORF46        |                                                                        |                 | 50161        | 50643        | +         |
| ORF47        |                                                                        |                 | 51254        | 52024        | +         |
| ORF48        |                                                                        |                 | 52318        | 52896        | -         |
| <b>ORF49</b> | <b>Major capsid protein</b>                                            | <b>5.00E-48</b> | <b>52943</b> | <b>56320</b> | <b>-</b>  |
| ORF50        |                                                                        |                 | 56359        | 56769        | -         |
| <b>ORF51</b> | <b>ORF37</b>                                                           | <b>1.00E-08</b> | <b>56896</b> | <b>59178</b> | <b>+</b>  |
| ORF52        |                                                                        |                 | 59209        | 60093        | -         |
| ORF53        |                                                                        |                 | 60096        | 60557        | -         |
| ORF54        |                                                                        |                 | 60560        | 60910        | -         |
| <b>ORF55</b> | <b>ORF34</b>                                                           | <b>2.00E-42</b> | <b>60991</b> | <b>62469</b> | <b>-</b>  |
| ORF56        |                                                                        |                 | 62885        | 63874        | +         |
| ORF57        |                                                                        |                 | 64143        | 65333        | +         |
| ORF58        | coxsackievirus and adenovirus receptor homolog ( <i>N. brichardi</i> ) | 1.00E-04        | 66154        | 66639        | +         |
| ORF59        |                                                                        |                 | 67538        | 68032        | -         |
| ORF60        |                                                                        |                 | 68174        | 68974        | -         |
| ORF61        | Fc receptor-like protein 3 ( <i>M. zebra</i> )                         | 1.00E-57        | 69978        | 70829        | -         |
| ORF62        |                                                                        |                 | 70986        | 71306        | -         |
| ORF63        |                                                                        |                 | 72358        | 73236        | -         |
| ORF64        |                                                                        |                 | 73445        | 74011        | -         |

**Supplementary Table 7 Continued**

| Gene          | properties or putative functions                        | Evalue          | start                                                | end             | direction               |               |          |
|---------------|---------------------------------------------------------|-----------------|------------------------------------------------------|-----------------|-------------------------|---------------|----------|
| ORF65         | FK506-binding protein 4-like (O. niloticus)             | 1.00E-138       | 74023                                                | 74718           | -                       |               |          |
| ORF66         |                                                         |                 | 74947                                                | 75942           | +                       |               |          |
| ORF67         |                                                         |                 | 77135                                                | 78280           | -                       |               |          |
| ORF68         |                                                         |                 | 78972                                                | 79487           | +                       |               |          |
| ORF69         |                                                         |                 | 79677                                                | 80429           | -                       |               |          |
| ORF70         |                                                         |                 | interleukin-2 receptor subunit beta (M. zebra)       | 1.00E-05        | 81201                   | 81917         | +        |
| ORF71         |                                                         |                 |                                                      |                 | 82245                   | 83378         | +        |
| ORF72         |                                                         |                 |                                                      |                 | CDK-like (O. niloticus) | 9.00E-176     | 83401    |
| ORF73         |                                                         |                 | 84934                                                | 85977           |                         |               | -        |
| ORF74         | 86167                                                   | 86913           | +                                                    |                 |                         |               |          |
| ORF75         | 86977                                                   | 87396           | +                                                    |                 |                         |               |          |
| ORF76         | 87877                                                   | 88728           | -                                                    |                 |                         |               |          |
| ORF77         | 88839                                                   | 89831           | -                                                    |                 |                         |               |          |
| <b>ORF78</b>  | <b>DNA packaging terminase subunit 1</b>                | <b>1.00E-39</b> | <b>89896</b>                                         | <b>90798</b>    |                         |               | <b>+</b> |
| <b>ORF79</b>  | <b>Primase</b>                                          | <b>6.00E-30</b> | <b>91030</b>                                         | <b>93069</b>    | <b>+</b>                |               |          |
| ORF80         | myelin-oligodendrocyte glycoprotein                     | 3.00E-73        | 93858                                                | 94346           | -                       |               |          |
| ORF81         |                                                         |                 | 94675                                                | 95013           | -                       |               |          |
| ORF82         |                                                         |                 | 95304                                                | 96185           | -                       |               |          |
| ORF83         | ORF85_LPXTG_motif                                       | 7.00E-15        | 96396                                                | 97112           | -                       |               |          |
| ORF84         |                                                         |                 | 97455                                                | 98198           | +                       |               |          |
| ORF85         |                                                         |                 | 98372                                                | 99730           | +                       |               |          |
| ORF86         |                                                         |                 | 99846                                                | 101507          | +                       |               |          |
| ORF87         |                                                         |                 | apoptosis-associated_speck-like protein (L. crocea)  | 0.027           | 102202                  | 102816        | +        |
| ORF88         |                                                         |                 |                                                      |                 | 102974                  | 103315        | +        |
| ORF89         | ribonuclease 3 (C. testudinoris)                        | 0.033           | 104042                                               | 104566          | -                       |               |          |
| ORF90         |                                                         |                 | 105407                                               | 108829          | +                       |               |          |
| ORF91         | ubi carboxyl terminal hydrolase 1 (H. burtoni)          | 3.00E-178       | 109514                                               | 110122          | +                       |               |          |
| ORF92         |                                                         |                 | 110818                                               | 111768          | -                       |               |          |
| <b>ORF93</b>  |                                                         |                 | <b>ser/thr protein kinase</b>                        | <b>2.00E-10</b> | <b>112426</b>           | <b>114444</b> | <b>-</b> |
| ORF94         | E3 ubiquitin ligase makorin-like(T. chinensis)          | 5.00E-31        | 114465                                               | 115418          | -                       |               |          |
| ORF95         |                                                         |                 | 115567                                               | 116694          | +                       |               |          |
| ORF96         |                                                         |                 | 117022                                               | 117435          | +                       |               |          |
| ORF97         |                                                         |                 | 117888                                               | 118505          | -                       |               |          |
| ORF98         |                                                         |                 | coiled-coil domain-containing protein 86 (P. anubis) | 0.011           | 118484                  | 118906        | -        |
| ORF99         |                                                         |                 |                                                      |                 | 119002                  | 119727        | -        |
| ORF100        |                                                         |                 | cyclin-related protein (P. yoelii)                   |                 | 119846                  | 120220        | +        |
| <b>ORF101</b> |                                                         |                 | <b>DNA packaging terminase subunit 1</b>             | <b>8.00E-04</b> | <b>120459</b>           | <b>121193</b> | <b>-</b> |
| ORF102        | Cbp/p300-interacting transactivator 1 (L. crocea)       | 9.00E-83        | 121354                                               | 122235          | +                       |               |          |
| ORF103        |                                                         |                 | 122802                                               | 123578          | +                       |               |          |
| ORF104        |                                                         |                 | 123575                                               | 124099          | +                       |               |          |
| ORF105        |                                                         |                 | 124389                                               | 124688          | -                       |               |          |
| <b>ORF106</b> | <b>ORF64</b>                                            | <b>1.00E-07</b> | <b>124699</b>                                        | <b>126279</b>   | <b>-</b>                |               |          |
| ORF107        |                                                         |                 | 126347                                               | 127150          | -                       |               |          |
| ORF108        |                                                         |                 | 126985                                               | 132057          | -                       |               |          |
| ORF109        |                                                         |                 | 132016                                               | 133371          | +                       |               |          |
| ORF110        |                                                         |                 | 133496                                               | 136498          | +                       |               |          |
| ORF111        |                                                         |                 | 136527                                               | 137174          | +                       |               |          |
| ORF112        |                                                         |                 | 137684                                               | 138280          | -                       |               |          |
| ORF113        |                                                         |                 | 138282                                               | 142223          | -                       |               |          |
| ORF114        |                                                         |                 | 142426                                               | 143271          | -                       |               |          |
| ORF115        |                                                         |                 | 143333                                               | 143803          | -                       |               |          |
| <b>ORF116</b> |                                                         |                 | <b>ORF78 (lchV-1)</b>                                | <b>0.42</b>     | <b>143784</b>           | <b>145220</b> | <b>+</b> |
| ORF117        |                                                         |                 | 146929                                               | 147312          | +                       |               |          |
| <b>ORF118</b> | <b>ORF35 (AngHV-1)</b>                                  | <b>0.4</b>      | <b>151398</b>                                        | <b>151742</b>   | <b>-</b>                |               |          |
| ORF119        | DNA methyltransferase (Euryarchaeota archaeon)          | 3.00E-15        | 151861                                               | 152418          | -                       |               |          |
| ORF120        |                                                         |                 | 154311                                               | 154637          | -                       |               |          |
| ORF121        |                                                         |                 | 154638                                               | 155144          | -                       |               |          |
| ORF122        |                                                         |                 | 155407                                               | 155790          | -                       |               |          |
| ORF123        |                                                         |                 | 156788                                               | 157330          | -                       |               |          |
| ORF124        |                                                         |                 | 157263                                               | 158930          | -                       |               |          |
| ORF125        |                                                         |                 | 159033                                               | 159887          | +                       |               |          |
| ORF126        |                                                         |                 | 160058                                               | 160564          | -                       |               |          |
| <b>ORF127</b> |                                                         |                 | <b>ORF56</b>                                         | <b>2.00E-34</b> | <b>160751</b>           | <b>163183</b> | <b>+</b> |
| <b>ORF128</b> |                                                         |                 | <b>ORF56</b>                                         | <b>7.00E-06</b> | <b>163153</b>           | <b>164724</b> | <b>+</b> |
| ORF129        | CXCR-like (O.latipes)                                   | 2.00E-12        | 165041                                               | 165454          | -                       |               |          |
| ORF130        | CXCR-like (P. formosa)                                  | 2.00E-10        | 165707                                               | 166111          | -                       |               |          |
| ORF131        | MHC class I antigen, KD alpha chain-like (N. brichardi) | 0.002           | 166848                                               | 167330          | +                       |               |          |



**Supplementary Table 7 Continued**

| Gene          | properties or putative functions             | Evalue           | start         | end           | direction |
|---------------|----------------------------------------------|------------------|---------------|---------------|-----------|
| <b>ORF132</b> | <b>ORF54</b>                                 | <b>0.084</b>     | <b>167679</b> | <b>168074</b> | <b>-</b>  |
| ORF133        |                                              |                  | 168356        | 169252        | -         |
| <b>ORF134</b> | <b>ORF60</b>                                 | <b>9.00E-18</b>  | <b>169750</b> | <b>170202</b> | <b>-</b>  |
| ORF135        |                                              |                  | 170682        | 171425        | +         |
| ORF136        |                                              |                  | 172632        | 173885        | +         |
| <b>ORF137</b> | <b>DNA helicase (UL9 homolog)</b>            | <b>5.00E-47</b>  | <b>173899</b> | <b>175683</b> | <b>+</b>  |
| ORF138        |                                              |                  | 175738        | 176136        | +         |
| <b>ORF139</b> | <b>Capsid triplex protein subunit 2</b>      | <b>0.007</b>     | <b>176409</b> | <b>177035</b> | <b>+</b>  |
| ORF140        |                                              |                  | 177978        | 178496        | -         |
| ORF141        |                                              |                  | 178534        | 179109        | -         |
| ORF142        |                                              |                  | 179189        | 180238        | -         |
| ORF143        | MHC class I antigen, alpha (O. latipes)      | 3.00E-31         | 180687        | 181424        | -         |
| ORF144        |                                              |                  | 181948        | 182808        | +         |
| ORF145        |                                              |                  | 183948        | 184325        | -         |
| ORF146        |                                              |                  | 187046        | 188065        | -         |
| ORF147        |                                              |                  | 188686        | 189111        | +         |
| ORF148        |                                              |                  | 190893        | 191699        | +         |
| ORF149        | probable Bax inhibitor 1-like (O. niloticus) | 2.00E-179        | 191854        | 192627        | -         |
| <b>ORF150</b> | <b><i>piggyBac</i></b>                       | <b>6.00E-135</b> | <b>193330</b> | <b>195923</b> | <b>-</b>  |

**Supplementary Table 8 | List of medaka strains used in this analysis.**

| Species                  | Collection site                                  |
|--------------------------|--------------------------------------------------|
| Hd-rR, <i>O. latipes</i> | Aichi, Japan                                     |
| HNI, <i>O. latipes</i>   | Niigata, Japan                                   |
| <i>O. curvinotus</i>     | Sam A tsuen, Plover Cove Country Park, Hong Kong |
| <i>O. luzonensis</i>     | Solsona, Ilocos Norte Province, Philippines      |
| <i>O. mekongensis</i>    | Udon Thani, Thailand                             |
| <i>O. dancena</i>        | Chidambaram, Tamil Nadu, India                   |
| <i>O. javanicus</i>      | Penang, Malaysia                                 |
| <i>O. celebensis</i>     | Malino river, Sulawesi, Indonesia                |
| <i>O. sarasinorum</i>    | Lake Lindu, Sulawesi, Indonesia                  |
| <i>O. nigrimas</i>       | Tentena, Lake Poso, Sulawesi, Indonesia          |
| <i>O. matanensis</i>     | Soroako, Lake Matano, Sulawesi, Indonesia        |
| <i>O. marmoratus</i>     | Timampuu, Lake Towuti, Sulawesi, Indonesia       |
| <i>O. profundicola</i>   | Timampu, Lake Towuti, Sulawesi, Indonesia        |

## Supplementary Table 9 | Primer sequences used in this analysis.

| Experiment          | Name                              | Primer sequence                          |
|---------------------|-----------------------------------|------------------------------------------|
| BAC Screening       | Tera_LeftR1                       | GTAAAAACAGCGGAGGGAATGGGTTTCGTGC          |
|                     | Tera_LeftR2                       | AGACCCCAAAGCAGCATGCCAACCTAAG             |
|                     | Tera_RightF                       | GGTGTACCTGTCTGGGTCAATACCAAAGG            |
|                     | 13I17_LeftF                       | AAGGCTGTGCCCTCTGCAATGAGACTGTTA           |
|                     | 13I17_RightR                      | GACAGCTACAAGTCTGGTATGAGAGAGTC            |
|                     | 14A10_LeftF                       | CTCTGGATGAAAAAGACTTCTAACCAAGTGG          |
|                     | 14A10_RightR                      | GTCCAGAAAAGCTGTTTTACACGGAGTCCCTA         |
|                     | 6L21_LeftF                        | ACAGTGCTTCATAGAGAAAACGCTTCCAC            |
|                     | 6L21_RightR                       | CAGTGTGGGATCTTTGAAAAGGTCAG               |
|                     | 11H24_LeftF                       | AGAATGAGCTCCAACAATCCCTTCATGC             |
|                     | 11H24_RightF                      | AAACCAGTGAGGCATTACCAGCTTTTGC             |
|                     | 11H24_RightR                      | TGACGAAGAAAATACGGTATCCAGCTGTC            |
|                     | 73I9_LeftF                        | GGGAATGGTGTGAACAGTTTGGAGTTTC             |
|                     | 73I9_RightF                       | TCCACATAGTCCATCTAGGATTTGAGG              |
|                     | 73I9_RightR                       | GGAGCGGAGTAAGCAGTTTACATAACCC             |
|                     | 85H23_LeftF                       | GTTGTGTCACTACGCATTCTTTCTCACC             |
|                     | 85H23_RightR                      | GTCTTCAAATCCACACAGGCCAGGTC               |
|                     | Indicator plasmid                 | AcGFP_in_fusion_F                        |
| AcGFP_in_fusion_R   |                                   | GTGCGACTGCAGAATTCTGTAAGTGAACCTTTGGATGGTC |
| Sub1_LeftTIR_F      |                                   | CATTGATGAATGAGACGGCTTTGATTTGGA           |
| Sub1_LeftTIR_R      |                                   | TTATCGATCCCTGGTGGTCTGCGCTGTAAG           |
| Sub1_puroGFP_F      |                                   | CACCAGGGATCGATAACCGTATTACCGCCATGC        |
| Sub1_puroGFP_R      |                                   | CGCTTTACCGCCTTTGAGTGAGCTGATACCGC         |
| Sub1_RightTIR_F     |                                   | AAAGGGGGTAAAGCGAGACCCAGGTGGTG            |
| Sub1_RightTIR_R     |                                   | TGTAAGTGAACCTTTGGATGGTCACACA             |
| Sub1_internal_TIR_F |                                   | gaacatcaATCGATCTGGTGGTCTGCGCTGTAAG       |
| Sub1_internal_TIR_R |                                   | gttacgttATCGATCGGATTACTGTGTCAAAGTGC      |
| Sub2_LeftTIR_F      |                                   | CAGTAAGGCCAGTAGATGAGCGGATGTG             |
| Sub2_LeftTIR_R      |                                   | GTTATCGATTGAGTAAGTAAGTTCCGGTCCGCTG       |
| Sub2_puroGFP_F      |                                   | CTTCTACGAATCGATAACCGTATTACCGCCATGC       |
| Sub2_puroGFP_R      |                                   | ACCTGATGCCGCTTTGAGTGAGCTGATACCGC         |
| Sub2_RightTIR_F     |                                   | ACCTGATGCCGCTTTGAGTGAGCTGATACCGC         |
| Sub2_RightTIR_R     |                                   | ACCTGATGCCGCTTTGAGTGAGCTGATACCGC         |
| Sub2_internal_TIR_F |                                   | GAACATCAATCGATCTCATAGAAGTAAGAGTGGGGTC    |
| Sub2_internal_TIR_R |                                   | GTTACGTTATCGATTAGATCAGGTGAGTGAATGAC      |
| Helper plasmid      | Sub1_TPase_CDS_Kozak_F            | GGAATTCGCCACCATGAACAAAGGCCGCAAAGAAC      |
|                     | Sub1_TPase_CDS_R                  | GTGCGACTCACTGGGACGCGTCTGTG               |
|                     | Sub2_TPase_CDS_Kozak_F            | GAATTCGCCACCATGGGTCCCAAAGACCTCAAAG       |
|                     | Sub2_TPase_CDS_R                  | GGTCGACCTAGTCTGTGCTCACTGTTGGAATCG        |
| (EPTS)LM-PCR        | LMPCR-adaptor-long-oligo          | GACCCGGGAGATCTGAATTCAGTGGCACAGCAGTTAGG   |
|                     | LMPCR-adaptor-short-oligo         | (p)CCTAACTGCTGTGCCACTGAATTCAGATCTCCC     |
|                     | Sub1-LMPCR-LeftTIR-biotin-oligo-F | (bio-) TGAAAAACAGCGGAGGGAATGGAGAG        |
|                     | Sub2-LMPCR-LeftTIR-biotin-oligo-F | (bio-) TGACAATCGAGTGAACATTCTGACAG        |
|                     | Sub1-LMPCR-LeftTIR-primer         | AACCTAAGCGAGCGGAAG                       |
|                     | Sub2-LMPCR-LeftTIR-primer         | ACCTTCATTACAGCGTAGG                      |
|                     | LMPCR-common-primer               | GACCCGGGAGATCTGAATTC                     |
| RT-PCR              | piggyBac_F                        | TCAGAGAGGTGTGGGAAGAGTG                   |
|                     | piggyBac_R                        | GTCATTCTCCTGCAGCTGTACG                   |
|                     | DNA_polymerase_F                  | CACAGGTGCAGGATCACGCTCAACATAG             |
|                     | DNA_polymerase_R                  | GGAGGATCAGCTCGCATACTCAAAGC               |

| Experiment                   | Name                    | Primer sequence              |                      |
|------------------------------|-------------------------|------------------------------|----------------------|
| RT-PCR                       | DNA_helicase_F          | CACCGTGTGAACTGGAGGTAGGAGAGTG |                      |
|                              | DNA_helicase_R          | TTTGTCGAGCGCTACAGGAGATGCTACC |                      |
|                              | Terminase_F             | GTTGCTGCTGGACAGAAAGTGAGCGAAG |                      |
|                              | Terminase_R             | GATGGAGCTCTTGAGAGGAGTCGTGCTG |                      |
|                              | Major_capsid_F          | TTCAAGCAGCAGAAGGACACGAGC     |                      |
|                              | Major_capsid_R          | TCAGCACAGAGTCCAGCTTCTCC      |                      |
|                              | Capsid_triplex_F        | ACCGCTACGTTCCCACTCTACAC      |                      |
|                              | Capsid_triplex_R        | GAATCTGTCGTTACCAAAGACG       |                      |
|                              | Membrane_glycoprotein_F | GCGTCCCTGAGGAGTCCAAGTTCTTG   |                      |
|                              | Membrane_glycoprotein_R | AGAGACTACGGCAAGCTGTGCGATTGAG |                      |
|                              | ZFP36_F                 | TCTGAACACCCAAACAGCTCTCA      |                      |
|                              | ZFP36_R                 | GGAAACGTCCATCTGTCCGTAG       |                      |
|                              | CXCR_F                  | GTTCAAGTGGTACCCATGCTTC       |                      |
|                              | CXCR_R                  | CGACTTTGAAGGTTTCGTGATTG      |                      |
|                              | DNA_methyltransferase_F | CTCGTCTCTTTCCGGTACTTGG       |                      |
|                              | DNA_methyltransferase_R | GAGACACGGGGCTGATATAGTGA      |                      |
|                              | CDK_F                   | AGTTGTCTACAGGGTGGGAGATG      |                      |
|                              | CDK_R                   | CTCCAAACTCCACATGTCTACG       |                      |
|                              | pim_F                   | GCAAAGTGTCTGGGAAAGAGG        |                      |
|                              | pim_R                   | TGTCGTTTCCAAATGGTATGTCC      |                      |
|                              | ZnSCAN_F                | TGGAGCGATGATGAGGTTAAATG      |                      |
|                              | ZnSCAN_R                | ATAAATTCCGTTTGCCCTTACCTG     |                      |
|                              | bactin_F                | GATGAAGCCAGAGCAAGAG          |                      |
|                              | bactin_R                | AGGAAGGAAGGCTGGAAGAG         |                      |
|                              | qRT-PCR                 | piggyBac_qPCR_F              | GGTTCCTTCAAAGGACGTTG |
|                              |                         | piggyBac_qPCR_R              | CCTCCAAGCGTAGCTCGTC  |
| DNA_polymerase_qPCR_F        |                         | CGATTTGCGCCAGCATGTACC        |                      |
| DNA_polymerase_qPCR_R        |                         | ACTTGTACACGACCCATCCG         |                      |
| DNA_helicase_qPCR_F          |                         | CAGCAGGATCTTCGCTCGG          |                      |
| DNA_helicase_qPCR_R          |                         | GTCATGAGCCCGTACTCGTC         |                      |
| Terminase_qPCR_F             |                         | CTTGAGAGGAGTCGTGCTGG         |                      |
| Terminase_qPCR_R             |                         | CGGGTCTGGTAATCGTAGC          |                      |
| Major_capsid_qPCR_F          |                         | GGTTCACGAGGCGTTACAAG         |                      |
| Major_capsid_qPCR_R          |                         | GGTTCACGAGGCGTTACAAG         |                      |
| Capsid_triplex_qPCR_F        |                         | CGCTACGTTCCCACTCTACA         |                      |
| Capsid_triplex_qPCR_R        |                         | TTCAGGAACGGTCTGTCCAC         |                      |
| Membrane_glycoprotein_qPCR_F |                         | TCTGGCATTGCACGTGTCTC         |                      |
| Membrane_glycoprotein_qPCR_R |                         | GTTCTTGTGGCGATCTCGG          |                      |
| ZFP36_qPCR_F                 |                         | GATATGTTCAACAGAGCTGACAC      |                      |
| ZFP36_qPCR_R                 |                         | GGTAGCCGTCCTTGTTCAGA         |                      |
| CXCR_qPCR_F                  |                         | GGTGATAACTTTCTGCCTGC         |                      |
| CXCR_qPCR_R                  |                         | GATATGTTCAACAGAGCTGACAC      |                      |
| DNA_methyltransferase_qPCR_F |                         | CTCCGTGCGAAAACACTACAGC       |                      |
| DNA_methyltransferase_qPCR_R |                         | TGCGAGGGTTTTGTCCATGA         |                      |
| CDK_qPCR_F                   |                         | CAAAGCTATTACCGCCAGC          |                      |
| CDK_qPCR_R                   |                         | AGCACGTTACTCGGAACCAG         |                      |
| pim_qPCR_F                   |                         | CTCCTACTGGGCGAGCTTAG         |                      |
| pim_qPCR_R                   |                         | TCAGCATCGGTCTCTCTTGG         |                      |
| ZnSCAN_qPCR_F                |                         | GGTAGCCGTCCTTGTTCAGA         |                      |
| ZnSCAN_qPCR_R                |                         | GCCACGAGCGCTTAAAACC          |                      |
| bactin_qPCR_F                | TGCCGCACTGGTTGTTGACAACG |                              |                      |
| bactin_qPCR_R                | CCAGGCACCAGGGTGTCTATGG  |                              |                      |

| Experiment                   | Name                         | Primer sequence               |
|------------------------------|------------------------------|-------------------------------|
| Antibodies                   | Major_capsid_GST_F           | AAGAATTCGTGCGAGGGGGAGACGTG    |
|                              | Major_capsid_GST_R           | AAGTCGACCTACTGCATGATGTCCGTGGC |
|                              | Triplex_GST_F                | AAGAATTCGACAGCAACCGCTACGTTC   |
|                              | Triplex_GST_R                | AAGTCGACCTACATGCTTGAGCGCCTGC  |
|                              | Membrane_glycoprotein_GST_F  | AAGAATTC AAGGAGCCCCACAGGGAG   |
|                              | Membrane_glycoprotein_GST_R  | AAGTCGACCTACGCCGTTTCACGATCAC  |
| Medaka related species       | DNA_polymerase_deg_F1        | GTAARCTNYDSAAGCTRRCSGRCGT     |
|                              | DNA_polymerase_deg_F2        | GCSGTGCTBSTSTACAACTTGGTBG     |
|                              | DNA_polymerase_deg_R1        | CCAKGACTTTRCACTCYMCCTCCTG     |
|                              | DNA_polymerase_deg_R2        | CKGTTGAGRTARTRCTCNACMGAGG     |
|                              | Major_capsid_deg_F1          | TCACSKTNGACGAMRTSGACTAYTG     |
|                              | Major_capsid_deg_F2          | CVGGCWTGTCSTAYCTRMTGTTGAG     |
|                              | Major_capsid_deg_F3          | GGCWTGTCSTAYCTRHTGTTGAG       |
|                              | Major_capsid_deg_R1          | CTGAACAKYAGRTASGACAWGCCBG     |
|                              | Major_capsid_deg_R2          | GTNGTGAARATGTA VGGYCTGCGGT    |
|                              | Major_capsid_deg_R3          | TAAGTACCRCAAGAARGCMACYCCNA    |
|                              | Major_capsid_deg_R4          | AGTACCDCAAGAARGCMACYCCNA      |
|                              | Membrane_glycoprotein_deg_F1 | GCNATTTGCCTSAGACAGTTYTCHA     |
|                              | Membrane_glycoprotein_deg_F2 | CRTCATYTGATGSGTCACGCTYTGC     |
|                              | Membrane_glycoprotein_deg_F3 | GCGTCYCTGAGGAGTCCRAAGTTYTTG   |
|                              | Membrane_glycoprotein_deg_R1 | GTGAACGACRGNTACRYGNTGGAYA     |
|                              | Membrane_glycoprotein_deg_R2 | CCCACSASNGAYMSCARTCACTAYA     |
|                              | Membrane_glycoprotein_deg_R3 | AGAGACTACGGCAAGCTGTGCGATTCTRG |
|                              | DNA_helicase_deg_F1          | AGTTCATCTCCACBCKTTTRCGRTA     |
|                              | DNA_helicase_deg_F2          | TARAAMNCMACMCGWCCSACNKWST     |
|                              | DNA_helicase_deg_F3          | RGTTTATCTCCWCBCKTTYRSGRKW     |
|                              | DNA_helicase_deg_R1          | GGCACATGGAYYMSAACGNATACA      |
|                              | DNA_helicase_deg_R2          | TSTTTGTCAACAGRMGRCAGTTCSA     |
|                              | DNA_helicase_deg_R3          | TSTTTTRTCAACAGRMGRCARTTCSA    |
|                              | Terminase_deg_F1             | ATCTCRTCTCTKGTGTGRC AHAGRA    |
|                              | Terminase_deg_F2             | TACATGWRCACGKCCATRKWGGAGC     |
|                              | Terminase_deg_F3             | AWCTCDTCYCTKGTGTGRC AHAAVA    |
|                              | Terminase_deg_F4             | TACATGHVCA CRKYCATRKNSGANC    |
|                              | Terminase_deg_F5             | TYTCRTCTCTKGTGTGRC ANAGVA     |
|                              | Terminase_deg_R1             | ATCTCRTCTCTKGTGTGRC AHAGRA    |
|                              | Terminase_deg_R2             | TACATGWRCACGKCCATRKWGGAGC     |
|                              | Terminase_deg_R3             | ARRTACATGYTVGGRAARCACGTNR     |
|                              | Terminase_deg_R4             | RGTACATGCTRGGRAARCACGTSR      |
|                              | piggyBac_F                   | TCAGAGAGGTGTGGGAAGAGTG        |
|                              | piggyBac_R                   | GTCAATCTCCTGCAGCTGTACG        |
| Major_capsid_sub2_F          | CCGGCTTGTCTATCTGTTGTTGAG     |                               |
| Major_capsid_sub2_R          | TAAGTACCACAGAAAGCCACCCCGA    |                               |
| Membrane_glycoprotein_sub2_F | AGAGACTACGGCAAGCTGTGCGATTGAG |                               |
| Membrane_glycoprotein_sub2_R | GCGTCTCTGAGGAGTCCGAAGTTTTTG  |                               |
